# Supplementary material for: Polyclonal antibody responses to HIV Env immunogens resolved using cryoEM
Source: PubMed Central journal article supplement (PMC8355326; doi:10.1038/s41467-021-25087-4), 2021-08-10
Supplement: 41467_2021_25087_MOESM1_ESM.pdf [file 41467_2021_25087_MOESM1_ESM.pdf]

## Supplementary Information

### Polyclonal antibody responses to HIV Env immunogens resolved using cryoEM

Aleksandar Antanasijevic<sup>1,2</sup>, Leigh M. Sewall<sup>1,2</sup>, Christopher A. Cottrell<sup>1,2</sup>, Diane G. Carnathan<sup>3</sup>, Luis E. Jimenez<sup>3</sup>, Julia T. Ngo<sup>3</sup>, Jennifer B. Silverman<sup>3</sup>, Bettina Groschel<sup>4</sup>, Erik Georgeson<sup>4</sup>, Jinal Bhiman<sup>4</sup>, Raiza Bastidas<sup>4</sup>, Celia LaBranche<sup>5</sup>, Joel D. Allen<sup>6</sup>, Jeffrey Copps<sup>1</sup>, Hailee R. Perrett<sup>1</sup>, Kimmo Rantalainen<sup>4</sup>, Fabien Cannac<sup>1</sup>, Yuhe R. Yang<sup>1</sup>, Alba Torrents de la Peña<sup>1</sup>, Rebeca Froes Rocha<sup>1</sup>, Zachary T. Berndsen<sup>1</sup>, David Baker<sup>7,8</sup>, Neil P. King<sup>7</sup>, Rogier W. Sanders<sup>9,10</sup>, John P. Moore<sup>10</sup>, Shane Crotty<sup>11</sup>, Max Crispin<sup>6</sup>, David C. Montefiori<sup>5</sup>, Dennis R. Burton<sup>2,4</sup>, William R. Schief<sup>2,4</sup>, Guido Silvestri<sup>3</sup>, Andrew B. Ward<sup>1,2#</sup>

#### Author affiliations:

- 1- Department of Integrative, Structural and Computational Biology, The Scripps Research Institute, La Jolla, CA 92037, USA.
- 2- International AIDS Vaccine Initiative Neutralizing Antibody Center, the Collaboration for AIDS Vaccine Discovery (CAVD) and Scripps Consortium for HIV/AIDS Vaccine Development (CHAVID), The Scripps Research Institute, La Jolla, CA 92037, USA.
- 3- Division of Microbiology and Immunology, Yerkes National Primate Research Center, Emory University, Atlanta, GA 30329, USA.
- 4- Department of Immunology and Microbiology, The Scripps Research Institute, La Jolla, CA 92037, USA.
- 5- Department of Surgery, Duke University Medical Center, Durham, NC, 27710, USA.
- 6- School of Biological Sciences, University of Southampton, Southampton, SO17 1BJ, United Kingdom.
- 7- Institute for Protein Design, Department of Biochemistry, University of Washington, Seattle, WA 98195, USA.
- 8- Howard Hughes Medical Institute, Chevy Chase, MD 20815, USA.
- 9- Academic Medical Center (AMC), University of Amsterdam, Amsterdam 1105AZ, Netherlands.
- 10- Weill Cornell Medicine, Cornell University, New York, NY 10065, USA.
- 11- La Jolla Institute for Immunology, La Jolla, CA 92037, USA.

# Correspondence should be addressed to: Andrew B. Ward, [andrew@scripps.edu](mailto:andrew@scripps.edu)

**Supplementary Table 1. Anti-trimer binding antibody titers (midpoint, EC<sub>50</sub>) determined via ELISA for plasma samples collected at indicated time points.**  
 Color coding: white - value not determined (N/D) or material not available (N/A); light-gray - no detectable binding (EC<sub>50</sub> < 20); light orange - 20 < EC<sub>50</sub> < 100); medium orange - 100 < EC<sub>50</sub> < 500; dark orange - 500 < EC<sub>50</sub> < 1000; brown - EC<sub>50</sub> > 1000.

|                                                                |                    | Week 6 | Week 10 | Week 26 | Week 38 |
|----------------------------------------------------------------|--------------------|--------|---------|---------|---------|
| Group / Immunogen                                              | Animal ID          |        |         |         |         |
| <b>Grp 1</b><br>BG505 SOSIP MD39                               | 32034              | < 20   | 93      | 167     | 164     |
|                                                                | 32113              | < 20   | 196     | 479     | 1233    |
|                                                                | 34943              | < 20   | 75      | 166     | 101     |
|                                                                | 34909              | < 20   | 115     | 109     | N/D     |
|                                                                | 33104              | < 20   | 151     | 323     | 231     |
|                                                                | 33395              | < 20   | 288     | 516     | 253     |
| <b>Grp 2</b><br>BG505 SOSIP.v5.2<br>N241/N289                  | 34686              | 61     | 277     | 134     | 86      |
|                                                                | 33182              | 36     | 1073    | 587     | 364     |
|                                                                | 33311              | 35     | 1921    | 121     | 626     |
|                                                                | CD99               | 54     | 595     | 242     | 325     |
|                                                                | 33203              | 47     | 381     | 310     | 233     |
|                                                                | CG41               | 42     | 1430    | 256     | 378     |
| <b>Grp 3</b><br>BG505 SOSIP.v5.2(7S)<br>N241/N289<br>T33-31 NP | 33172              | 33     | 858     | 431     | 595     |
|                                                                | 34919              | < 20   | 342     | 384     | 356     |
|                                                                | 34167              | 64     | 929     | 860     | 832     |
|                                                                | 33065              | 30     | 211     | 178     | 295     |
|                                                                | 33176 <sup>#</sup> | 54     | 451     | N/A     | N/A     |
|                                                                | 34725              | 57     | 480     | 397     | 850     |

<sup>#</sup> This animal was euthanized early due to chronic health issues. Sera samples were not available for Week 26 and Week 38 time points (see Methods section for details).

N/D – Not determined

N/A – Samples not available

**Supplementary Table 2. Autologous neutralization titers (ID<sub>50</sub>) against BG505-based pseudovirus.** Midpoint neutralization titers (ID<sub>50</sub>) were determined using sera samples collected at different time points (indicated in the top row). Neutralization assays with VRC01 were also performed (positive control). Color coding: light gray - no neutralization (ID<sub>50</sub> < 40); light orange - very weak neutralization (40 < ID<sub>50</sub> < 100); medium orange - moderate neutralization (100 < ID<sub>50</sub> < 500); dark orange - strong neutralization (500 < ID<sub>50</sub> < 2000); brown - very strong neutralization (ID<sub>50</sub> > 2000).

|                                                             |                          | <b>Week 10</b> | <b>Week 26</b> | <b>Week 38</b> |
|-------------------------------------------------------------|--------------------------|----------------|----------------|----------------|
|                                                             | Virus                    | BG505          | BG505          | BG505          |
| Group / Immunogen                                           | Animal ID                |                |                |                |
| <b>Grp 1</b><br>BG505 SOSIP MD39                            | 32034                    | 41             | 322            | 1131           |
|                                                             | 32113                    | < 40           | < 40           | < 40           |
|                                                             | 34943                    | < 40           | < 40           | < 40           |
|                                                             | 34909                    | 84             | 506            | 1212           |
|                                                             | 33104                    | < 40           | < 40           | < 40           |
|                                                             | 33395                    | 42             | 267            | 1477           |
| <b>Grp 2</b><br>BG505 SOSIP.v5.2 N241/N289                  | 34686                    | < 40           | < 40           | < 40           |
|                                                             | 33182                    | < 40           | < 40           | < 40           |
|                                                             | 33311                    | < 40           | 604            | 8599           |
|                                                             | CD99                     | < 40           | < 40           | 111            |
|                                                             | 33203                    | < 40           | 66             | 123            |
|                                                             | CG41                     | < 40           | 378            | 507            |
| <b>Grp 3</b><br>BG505 SOSIP.v5.2(7S) N241/N289<br>T33-31 NP | 33172                    | < 40           | < 40           | 407            |
|                                                             | 34919                    | < 40           | < 40           | < 40           |
|                                                             | 34167                    | < 40           | < 40           | < 40           |
|                                                             | 33065                    | < 40           | 47             | 232            |
|                                                             | 33176#                   | < 40           | N/A            | N/A            |
|                                                             | 34725                    | < 40           | < 40           | < 40           |
| VRC01                                                       | IC <sub>50</sub> (µg/ml) | 0.05           | 0.04           | 0.05           |

# This animal was euthanized early in the study due to chronic health issues. Sera samples were not available for Week 26 and Week 38 time points (see Methods section for details)

N/A – Samples not available

**Supplementary Table 3. Cryo-EM data collection information**

|                                                  | <b>Rh.32034 Poly. Fab<br/>+<br/>BG505 SOSIP<br/>MD39</b> | <b>Rh.33104 Poly. Fab<br/>+<br/>BG505 SOSIP<br/>MD39</b> | <b>Rh.33311 Poly. Fab<br/>+<br/>BG505 SOSIP<br/>v5.2 N241/N289</b> | <b>Rh.33172 Poly. Fab<br/>+<br/>BG505 SOSIP<br/>v5.2(7S) N241/N289</b> | <b>BG505 SOSIP<br/>T33-31-NP</b> |
|--------------------------------------------------|----------------------------------------------------------|----------------------------------------------------------|--------------------------------------------------------------------|------------------------------------------------------------------------|----------------------------------|
| <b>Microscope</b>                                | Titan Krios                                              | Titan Krios                                              | Titan Krios                                                        | Titan Krios                                                            | Talos Arctica                    |
| <b>Voltage (kV)</b>                              | 300                                                      | 300                                                      | 300                                                                | 300                                                                    | 200                              |
| <b>Detector</b>                                  | Gatan K2 Summit                                          | Gatan K2 Summit                                          | Gatan K2 Summit                                                    | Gatan K2 Summit                                                        | Gatan K2 Summit                  |
| <b>Recording mode</b>                            | Counting                                                 | Counting                                                 | Counting                                                           | Counting                                                               | Counting                         |
| <b>Magnification</b>                             | 29,000                                                   | 29,000                                                   | 29,000                                                             | 29,000                                                                 | 36,000                           |
| <b>Movie micrograph pixel size</b>               | 1.03                                                     | 1.03                                                     | 1.03                                                               | 1.03                                                                   | 1.15                             |
| <b>Dose rate (e<sup>-</sup>/Å<sup>2</sup>/s)</b> | 5.98                                                     | 4.55                                                     | 4.55                                                               | 5.63                                                                   | 4.88                             |
| <b>No. of frames per movie micrograph</b>        | 30                                                       | 39                                                       | 39                                                                 | 36                                                                     | 41                               |
| <b>Frame exposure time (ms)</b>                  | 250                                                      | 250                                                      | 250                                                                | 250                                                                    | 250                              |
| <b>Movie micrograph exposure time (s)</b>        | 7.50                                                     | 9.75                                                     | 9.75                                                               | 9.00                                                                   | 10.25                            |
| <b>Total dose (e<sup>-</sup>/Å<sup>2</sup>)</b>  | 44.9                                                     | 44.3                                                     | 44.3                                                               | 50.7                                                                   | 50.0                             |
| <b>Grid Type</b>                                 | UltrAuFoil R 1.2/1.3                                     | UltrAuFoil R 1.2/1.3                                     | UltrAuFoil R 1.2/1.3                                               | Quantifoil R 2/1                                                       | Quantifoil R 2/1                 |
| <b>Under focus range (µm)</b>                    | 0.6 – 1.6                                                | 0.6 – 1.6                                                | 0.6 – 1.6                                                          | 0.6 – 1.6                                                              | 0.8 – 2.0                        |
| <b>Number of movie micrographs</b>               | 3,194                                                    | 3,580                                                    | 6,268                                                              | 4,521                                                                  | 1,751                            |

**Supplementary Table 4. Map and model refinement information**

| Animal ID                          | Rh.32034 (Grp 1) |        |        |         | Rh.33104 (Grp 1) |        |        |        | Rh.33311 (Grp 2)           |        |        |        |        |        |        |        |
|------------------------------------|------------------|--------|--------|---------|------------------|--------|--------|--------|----------------------------|--------|--------|--------|--------|--------|--------|--------|
| Complex ID                         | pAbC-1           | pAbC-2 | pAbC-3 | pAbC-4  | pAbC-1           | pAbC-2 | pAbC-3 | pAbC-4 | pAbC-1                     | pAbC-2 | pAbC-3 | pAbC-4 | pAbC-5 | pAbC-6 | pAbC-7 | pAbC-8 |
| Antigen                            | BG505 SOSIP MD39 |        |        |         | BG505 SOSIP MD39 |        |        |        | BG505 SOSIP.v5.2 N241/N289 |        |        |        |        |        |        |        |
| Number of picked particles         | 591,593          |        |        |         | 502,068          |        |        |        | 1,267,693                  |        |        |        |        |        |        |        |
| Particles after 2D classification  | 327,148          |        |        |         | 230,034          |        |        |        | 503,502                    |        |        |        |        |        |        |        |
| Particles after symmetry expansion | 981,444          |        |        |         | 690,102          |        |        |        | 1,510,506                  |        |        |        |        |        |        |        |
| Particles in the final map         | 48,919           | 37,870 | 47,950 | 106,016 | 81,561           | 27,719 | 58,378 | 11,534 | 82,126                     | 28,188 | 39,028 | 27,483 | 52,082 | 12,653 | 70,307 | 29,622 |
| Map symmetry                       | C1               | C1     | C1     | C1      | C1               | C1     | C1     | C1     | C1                         | C1     | C1     | C1     | C1     | C1     | C1     | C1     |
| Map sharpening B-factor            | -79.6            | -94.3  | -7.1   | -12.1   | -87.6            | -90.8  | -83.4  | -93.9  | -103.8                     | -118.7 | -122.1 | -103.6 | -126.5 | -131.0 | -121.8 | -117.2 |
| Map Resolution                     | 3.4              | 3.6    | 3.6    | 3.8     | 3.3              | 3.7    | 3.4    | 4.6    | 3.7                        | 4.5    | 4.1    | 4      | 4.2    | 6.6    | 3.8    | 4.5    |
| EMDB ID                            | 23223            | 23224  | 23225  | 23226   | 23227            | 23228  | 23229  | 23230  | 23236                      | 23237  | 23238  | 23239  | 23240  | 23241  | 23242  | 23243  |
| Residues                           | 2010             | 2004   | 1992   | 1988    | 2007             | 2003   | 2022   | 1972   | 2082                       | 1978   | 2012   | 2039   | 2031   | N/A    | 2026   | 1976   |
| Amino acids                        | 1910             | 1901   | 1898   | 1888    | 1910             | 1909   | 1911   | 1871   | 1994                       | 1893   | 1926   | 1936   | 1951   | N/A    | 1930   | 1897   |
| Carbohydrates                      | 100              | 103    | 94     | 100     | 97               | 94     | 111    | 101    | 88                         | 85     | 86     | 103    | 80     | N/A    | 96     | 79     |
| RMSD Bonds (4 $\sigma$ )           | 0.022            | 0.021  | 0.021  | 0.022   | 0.023            | 0.021  | 0.025  | 0.021  | 0.021                      | 0.021  | 0.02   | 0.021  | 0.02   | N/A    | 0.022  | 0.02   |
| RMSD Angles (4 $\sigma$ )          | 1.653            | 1.722  | 1.684  | 1.723   | 1.709            | 1.687  | 1.698  | 1.669  | 1.674                      | 1.702  | 1.679  | 1.647  | 1.633  | N/A    | 1.716  | 1.71   |
| Ramachandran                       |                  |        |        |         |                  |        |        |        |                            |        |        |        |        |        |        |        |
| Outliers (%)                       | 0                | 0      | 0      | 0       | 0                | 0      | 0      | 0      | 0                          | 0      | 0      | 0      | 0      | N/A    | 0      | 0      |
| Allowed (%)                        | 1.88             | 3.5    | 3.19   | 2.61    | 2.09             | 2.57   | 2.41   | 2.25   | 2.19                       | 3.35   | 2.01   | 2.53   | 2.66   | N/A    | 3.59   | 2.86   |
| Favored (%)                        | 98.12            | 96.5   | 96.81  | 97.39   | 97.91            | 97.43  | 97.59  | 97.75  | 97.81                      | 96.65  | 97.99  | 97.47  | 97.34  | N/A    | 96.41  | 97.14  |
| Rotamer outliers (%)               | 0                | 0      | 0      | 0       | 0                | 0      | 0      | 0      | 0                          | 0      | 0      | 0      | 0      | N/A    | 0      | 0      |
| Clash score                        | 1.22             | 1.99   | 2.17   | 2.07    | 1.19             | 2.16   | 0.9    | 2.6    | 1.45                       | 2.67   | 1.34   | 0.91   | 1.87   | N/A    | 1.01   | 2.97   |
| Molprobrity score                  | 0.84             | 1.2    | 1.19   | 1.1     | 0.85             | 1.1    | 1.11   | 1.1    | 0.93                       | 1.27   | 0.87   | 0.88   | 1.08   | N/A    | 1.04   | 1.24   |
| EMRinger score                     | 4.17             | 3.36   | 3.75   | 3.71    | 4.33             | 3.73   | 4.33   | 0.77   | 3.25                       | 0.93   | 2.29   | 2.79   | 2.39   | N/A    | 2.99   | 1.38   |
| PDB ID                             | 7L86             | 7L87   | 7L88   | 7L89    | 7L8A             | 7L8B   | 7L8C   | 7L8D   | 7L8T                       | 7L8U   | 7L8W   | 7L8X   | 7L8Y   | N/A    | 7L8Z   | 7L90   |

**Supplementary Table 4. Map and model refinement information (continued)**

| Animal ID                          | N/A            |                    |                    | Rh.33172 (Grp 3)               |        |        |        |        |
|------------------------------------|----------------|--------------------|--------------------|--------------------------------|--------|--------|--------|--------|
| Complex ID                         | T33-31 NP core | BG505 SOSIP Comp A | BG505 SOSIP Comp B | pAbC-1                         | pAbC-2 | pAbC-3 | pAbC-4 | pAbC-5 |
| Antigen                            | N/A            |                    |                    | BG505 SOSIP.v5.2(7S) N241/N289 |        |        |        |        |
| Number of picked particles         | 223,099        | 441,476*           | 441,476*           | 1,121,581                      |        |        |        |        |
| Particles after 2D classification  | 214,224        | 353,064            | 316,582            | 456,268                        |        |        |        |        |
| Particles after symmetry expansion | N/A            |                    |                    | 1,368,804                      |        |        |        |        |
| Particles in the final map         | 110,369        | 106,478            | 64,726             | 31,914                         | 66,171 | 33,361 | 28,929 | 33,802 |
| Map symmetry                       | T              | C3                 | C3                 | C1                             | C1     | C1     | C1     | C1     |
| Map sharpening B-factor            | -53.1          | -70.5              | -164.5             | -124.0                         | -105.9 | -95.1  | -112.4 | -120.8 |
| Map Resolution                     | 2.9            | 3.7                | 3.8                | 4.2                            | 3.7    | 4.1    | 4.3    | 4.0    |
| EMDB ID                            | 23222          | 23218              | 23219              | 23231                          | 23232  | 23233  | 23235  | 23234  |
| Residues                           | 2664           | 1872               | 1857               | 2007                           | 2027   | 2002   | 2029   | N/A    |
| Amino acids                        | 2664           | 1770               | 1761               | 1912                           | 1939   | 1904   | 1925   | N/A    |
| Carbohydrates                      | 0              | 102                | 96                 | 95                             | 88     | 98     | 104    | N/A    |
| RMSD Bonds ( $4\sigma$ )           | 0.025          | 0.023              | 0.022              | 0.021                          | 0.021  | 0.021  | 0.021  | N/A    |
| RMSD Angles ( $4\sigma$ )          | 1.653          | 1.701              | 1.645              | 1.691                          | 1.654  | 1.701  | 1.687  | N/A    |
| Ramachandran                       |                |                    |                    |                                |        |        |        |        |
| Outliers (%)                       | 0              | 0                  | 0                  | 0                              | 0      | 0      | 0      | N/A    |
| Allowed (%)                        | 2.29           | 1.21               | 1.39               | 1.76                           | 2      | 2.15   | 1.91   | N/A    |
| Favored (%)                        | 97.71          | 98.79              | 98.61              | 98.24                          | 98     | 97.85  | 98.09  | N/A    |
| Rotamer outliers (%)               | 0              | 0                  | 0                  | 0                              | 0      | 0      | 0      | N/A    |
| Clash score                        | 2.46           | 0.2                | 1.76               | 2.15                           | 1.34   | 1.06   | 1.48   | N/A    |
| Molprobtity score                  | 1.1            | 0.58               | 0.93               | 0.99                           | 0.86   | 0.84   | 0.89   | N/A    |
| EMRinger score                     | 4.84           | 2.9                | 2.40               | 2.19                           | 3.31   | 1.87   | 1.9    | N/A    |
| PDB ID                             | 7L85           | 7L7T               | 7L7U               | 7L8E                           | 7L8F   | 7L8G   | 7L8S   | N/A    |

**Supplementary Table 5. Neutralization titers (ID<sub>50</sub>) against mutant BG505 pseudoviruses.** Midpoint neutralization titers (ID<sub>50</sub>) were determined using sera samples collected at the week 38 time point. Neutralization assays with MLV (negative control) and CH01-31 (positive control and reference) were performed. Color coding: light gray - no neutralization (ID<sub>50</sub> < 20); light orange - very weak neutralization (20 < ID<sub>50</sub> < 100); medium orange - moderate neutralization (100 < ID<sub>50</sub> < 500); dark orange - strong neutralization (500 < ID<sub>50</sub> < 2000); brown - very strong neutralization (ID<sub>50</sub> > 2000).

|                                                                |                          | <b>Week 38</b> |                |                      |                      |                      |                      |                      |
|----------------------------------------------------------------|--------------------------|----------------|----------------|----------------------|----------------------|----------------------|----------------------|----------------------|
| Virus                                                          |                          | SVA<br>MLV     | BG505<br>T332N | BG505<br>T332N.T465N | BG505<br>T332N.S241N | BG505<br>T332N.P291T | BG505<br>T332N.N156A | BG505<br>T332N.N611A |
| Group /<br>Immunogen                                           | Animal ID                |                |                |                      |                      |                      |                      |                      |
| <b>Grp 1</b><br>BG505 SOSIP MD39                               | 32034                    | <20            | 714            | <20                  | 870                  | 413                  | 417                  | N/D                  |
|                                                                | 32113                    | <20            | <20            | <20                  | <20                  | <20                  | <20                  | N/D                  |
|                                                                | 34943                    | <20            | 36             | <20                  | <20                  | <20                  | <20                  | N/D                  |
|                                                                | 34909                    | <20            | 285            | <20                  | 314                  | 126                  | <20                  | N/D                  |
|                                                                | 33104                    | <20            | <20            | <20                  | <20                  | <20                  | <20                  | N/D                  |
|                                                                | 33395                    | <20            | 1129           | 338                  | 1137                 | 749                  | 627                  | N/D                  |
| <b>Grp 2</b><br>BG505 SOSIP.v5.2<br>N241/N289                  | 34686                    | <20            | <20            | <20                  | N/D                  | <20                  | N/D                  | 25                   |
|                                                                | 33182                    | <20            | <20            | <20                  | N/D                  | <20                  | N/D                  | 72                   |
|                                                                | 33311                    | <20            | 3073           | 200                  | N/D                  | 1383                 | N/D                  | 4237                 |
|                                                                | CD99                     | <20            | 67             | 41                   | N/D                  | 34                   | N/D                  | 60                   |
|                                                                | 33203                    | <20            | 27             | <20                  | N/D                  | <20                  | N/D                  | 41                   |
|                                                                | CG41                     | <20            | 1608           | <20                  | N/D                  | 759                  | N/D                  | 1595                 |
| <b>Grp 3</b><br>BG505 SOSIP.v5.2(7S)<br>N241/N289<br>T33-31 NP | 33172                    | <20            | 229            | 230                  | 207                  | 177                  | 320                  | N/D                  |
|                                                                | 34919                    | <20            | <20            | <20                  | <20                  | <20                  | <20                  | N/D                  |
|                                                                | 34167                    | <20            | <20            | <20                  | <20                  | <20                  | 107                  | N/D                  |
|                                                                | 33065                    | <20            | 171            | 142                  | 172                  | 110                  | 299                  | N/D                  |
|                                                                | 33176#                   | N/A            | N/A            | N/A                  | N/A                  | N/A                  | N/A                  | N/A                  |
|                                                                | 34725                    | <20            | <20            | <20                  | <20                  | <20                  | 370                  | N/D                  |
| CH01-31                                                        | IC <sub>50</sub> (µg/ml) | >25            | 0.03           | 0.028                | 0.028                | 0.013                | 0.036                | 0.019                |

#This animal was euthanized early in the study due to chronic health issues. Sera samples were not available for Week 26 and Week 38 time points (see Methods section for details)

N/D – Not determined

N/A – Samples not available





**Supplementary Table 7. Nucleotide sequences of the constructs used in this study**

|                                           |                                                                                                                                                                                                                                                                                                                                                                                                                                                                                                                                                                                                                                                                                                                                                                                                                                                                                                                                                                                                                                                                                                                                                                                                                                                                                                                                                                                                                                                                                                                                                                                                                                                                                                                                                                                                                                                                                                                                                                                                                                                                                                                                                                                  |
|-------------------------------------------|----------------------------------------------------------------------------------------------------------------------------------------------------------------------------------------------------------------------------------------------------------------------------------------------------------------------------------------------------------------------------------------------------------------------------------------------------------------------------------------------------------------------------------------------------------------------------------------------------------------------------------------------------------------------------------------------------------------------------------------------------------------------------------------------------------------------------------------------------------------------------------------------------------------------------------------------------------------------------------------------------------------------------------------------------------------------------------------------------------------------------------------------------------------------------------------------------------------------------------------------------------------------------------------------------------------------------------------------------------------------------------------------------------------------------------------------------------------------------------------------------------------------------------------------------------------------------------------------------------------------------------------------------------------------------------------------------------------------------------------------------------------------------------------------------------------------------------------------------------------------------------------------------------------------------------------------------------------------------------------------------------------------------------------------------------------------------------------------------------------------------------------------------------------------------------|
| <p>BG505 SOSIP.v5.2(7S)<br/>N241/N289</p> | <p>ATGAAAAGGGGGCTGTGCTGTGTGCTGTGCTGTGCGGGGCTGTGTTTGTGTCAACCCAGTCAGGAAATCCACGCCAGATTCCG<br/>GAGAGGAGCTAGGGCAGAAAACCTGTGGGTGACAGTCTACTATGGCGTGCCTGTCTGGAAGGACGCCGAGACCACTGTTTT<br/>GCGCTTCCGATGCCAAGGCTTACGAACTAAGAAACACAATGTGTGGGCTACCCATTGCTGTGTCCCAACAGACCCAAACCCC<br/>CAGGAAATCCACCTGGAGAATGTGACCCGAGGAATTCACATGTGGAAGAACAATATGTTGGAAGCAGATGCATACAGACATCA<br/>TTCCCTGTGGGATCAGTCTCTGAAGCCTTGCCTGAAACTGACCCCACTGTGCGTCACTCCAGTGTACAAACGTGACTAACA<br/>ATATACCCGACGATATGCGCGGAGAAGTGAAGAAATGTTCTTCAACATGACTACCGAGCTGAGGGACAAGAAACGAGAAAGT<br/>GTACAGTCTGTTTTATCGCCTGGATGTGGTCCAGATCAATGAAAACCCAGGGGAATAGAAGTAAACAATTCAAAACAAGGAGTACA<br/>GGCTGATCAATTGCAACACCCAGTGCCATTACACAGGCTTGTCCAAAAGTGTCAATTTGAACTATCCCAATTCATTATTGGCCAC<br/>CTGCCGGCTTCCGCATCCTGAAGTGTAAAGATAAGAAGTTCACCGGCACTGGGCCCTGCCTAATGTGAGCACTGTCCAGTGT<br/>ACCCACGGGATTAAGCCTGTGGTCTCCACCCAGCTGCTGCTGAATGGATCTCTGGCCGAGGAAGAAGTGTATCATCCGGTCTGA<br/>GAACATCACTAACAACGCTAAGAACATCCTGGTGCAGTTAAACGAATCCGTCCAGATTAATTGCACTAGACCTAACAATAACA<br/>CCGTGAAATCTATCCGCATTGGACCCGGCCAGTGGTTTTATTATACCGGGCAGATCAATGGGGATATCCGGCAGGCACACTGTA<br/>ATGTGAGCAAGGCTACATGGAACGAGACTCTGGGGAAGGTGTTCAACACAGCTGCGCAACATTTCCGAAAATAACACCATCAT<br/>TCGATTTGCCAATAGCTCCGCGGGGACCTGGAAGTGAACAACACTACAGCTTCAACTGCGGAGGGGAGTCTTTTACTGTAACA<br/>CAAGTGGCCTGTTAATCAACTGGATCAGCAACCTCCGTGCAGGGCTCTAATTTACCGGCTTAAAGATAGTATCACAC<br/>TGCCATGCGGATTAAGCAGATCATTAAATATGTGGCAGAGATTCGGGCAAGCAATGTATGCCCCCTTACAGGCGAGTGATT<br/>CGATGTGTAGCAATATCACAGGCTGATTTCTGACTAGAGACGGGGATCAACAAACAGCACCACAGAGACTTTACAGCCCCCG<br/>CGGGGAGACATGCGGATTAAGTGGCGGTCCGAAGTGAACAAGTATAAAGTGTCAAGATCGAGCCACTGGGATGAGGAC<br/>ACCCGATGCAAAAGGCGAGTGGTCCGACGCAAGAAGGCGACGAGCTGTGGGGATGGAGCAGTCTCCCTGGGCTTTCTGG<br/>GGCCGCTGGATCTACAATGGCGCAGCCAGTATGACTCTGACCGTCCAGGCCAGGAATCTGTGTCAAGGATCTGTGCAGCAG<br/>CAGAGCAACCTGTGCGCGCTCCTGAATGCCAGCAGCATCTGTGAAGGACACCCCACTGGGCAATTCAGGCGAGCCAGCAG<br/>AGTGTGGCAGTGCAGCACTACCTGAGAGATCAGCAGCTGTGGGAATCTGGGGGTGCGAGCGGAAAGCTGATTGTGTACCA<br/>ATGTGCCTTGAAGTCTAGTTGGAGCAATAGAAACCTGTCCGAAATCTGGGACAATAGCATGGCTCCAGTGGGATAAGGAG<br/>ATTAGCAACTACACTCAGATCATCTACGGCCTGTGGAAGAGTCCGAAATCAGCAGGAGAAGAAGCAGCAGGACCTGTGG<br/>AGCTGGAC</p>   |
| <p>BG505 SOSIP.v5.2<br/>N241/N289</p>     | <p>ATGGACGCTATGAAAAGGGGGCTGTGCTGTGTGCTGTGCTGTGCGGGGCTGTGTTTGTGTCAACCCAGTCAGGAAATCCACGC<br/>CAGATTCCGGAGAGGAGCTAGGGCAGAAAACCTGTGGGTGACAGTCTACTATGGCGTGCCTGTCTGGAAGGACGCCGAGACC<br/>ACACTGTTTTGCGCTCCGATGCCAAGGCTTACGAACTAAGAAACACAATGTGTGGGCTACCCATTGCTGTGTCCCAACAGAC<br/>CCAAACCCCGAGGAAATCCACTGGAGAATGTGACCCGAGGAATTCACATGTGGAAGAACAATATGGTGGAGCAGATGCATA<br/>CAGACATCAATTCCTGTGGGATCAGTCTCTGAAGCCTTGCCTGAAACTGACCCCACTGTGCGTCACTCCAGTGTACAACAG<br/>TGACTAACAATATCACCGACGATATGCGCGGAGAAGTGAAGAAATGTTCTTCAACATGACTACCGAGCTGAGGGACAAGAA<br/>CAGAAAGTGTACAGTCTGTTTTATCGCCTGGATGTGGTCCAGATCAATGAAAACCCAGGGGAATAGAAGTAAACAAATCAAA<br/>GGAGTACAGGCTGATCAATTGCAACACCCAGTGCATTACACAGGCTTGTCCAAAAGTGTCAATTTGAACTATCCCAATTCATTA<br/>TTGGCCACCTGCGCGCTTCCCATCTGAAGTGTAAAGATAAAGAAAGTTCACCGGCACTGGGCTGactaacGTGACCTGTCC<br/>AGTGTACCCACGGGATTAAGCCTGTGGTCTCCACCCAGCTGTGCTGAATGGATCTCTGGCCGAGGAAGAAGTGTATCATCCGG<br/>TCTGAGAATCACTAACAACGCTAAGAACATCCTGGTGCAGTGAACGAGTCCGTCAGATTAATTGCACTAGACCTAACA<br/>TAACACCGAAGAAATCTATCCGCATTGGACCCGGCCAGTGGTTTTATGTACCGGGCAGATCAATGGGGATATCCGGCAGGCAC<br/>ACTGTAATGTGAGCAAGGCTACATGGAACGAGACTCTGGGGAAGTGGTCAAACAGCTGCGCAACATTTCCGAAAATAACAC<br/>CATCATTCGATTTGCCAATAGCTCCGGCGGGACCTGGAAGTGACAACCTACAGCTTCAACTCGGAGGGGAGTCTTTTACTG<br/>TAAACAAAGTGGCCTGTTAATCAACTTGGATCAGCAACACTCCGTCAGGGCTCTAATTTACCGGCTTAACTGATGATGAT<br/>CACACTGCCATGCGGATTAAGCAGATCATTAAATATGTGGCAGAGAATCGGGCAGGCAATGTATGCCCCCTATCCAGGGAG<br/>TGATTCGATGTGTCAGCAATATCACAGGCTGATTTCTGACTAGAGACGGGGGATCAACAACAGCACCACAGAGACTTTCCAG<br/>CCCGCGGGGAGACATGCGAGATAACTGGCGGTCCGAAGTGTACAAGTATAAAGTGGTCAAGATCGAGCCACTGGGAGTGG<br/>CACCAACCCGATGTAAGGCGAGTGGTCCGACGCAAGAAGGCGACGAGCTGTGGGGATGGAGCAGTCTTCTGGGCTT<br/>TCTGGGGCGCTGGATCTACAATGGCGCAGCCAGTATGACTCTGACCGTCCAGGCCAGGAATGTGCTGTACAGGCTGTGC<br/>AGCAGCAGAGCAACCTGTGCGCGCTCCGAAATGCCAGCAGATCTGTGAAAGTCAAGCTGTGGGGATCAAGCAGCTCCAG<br/>GCACAGTGTGGCAGTGCAGCGGTACCTGAGAGATCAGCAGCTGTGGAAATCTGGGGTGCAGCGGAAAGCTGATTTGCT<br/>GTACCAATGTGCCTTGG<sup>Gaac</sup>TCTAcTTGGAGCAATAGAAACCTGTCCGAAATCTGGGACAATAGCATGGCTCCAGTGGGATAA<br/>GGAGATTAGCAACTACACTCAGATCATCTACGGCCTGTGGAAGAGTCCGAAATCAGCAGGAGAAGAAGCAGGACGAGCCTG<br/>CTGGCCCTGGATTAA</p> |
| <p>BG505 SOSIP MD39</p>                   | <p>ATGAAAAGAGGCTGTGCTGTGTGCTGTGCTGTGTGGCGCGGTTCGTGAGCCCTCTCAGGAGATCCACGCCAGATTCCAG<br/>GCGAGGCGCCGGCCGAGAACCTGTGGGTGACCGTGTACTACGGCGTTCAGTGTGGAAAGACGCCGAGACAACCCCTGTCT<br/>GCGCCAGCGACGCCAAGGCTACGAGACCGAAAAGCACAACGTGTGGGCCACACATGCCTGCTGCCACCGACCCCAACCC<br/>CCAGGAGATCCACCTGGAACCGTACCGGAGGAATTCACATGTGGAAGAACAACATGGTGAACAGATGCACGAGGACATA<br/>ATCTCCCTGTGGGACCACTCTGAAACCTTGGTGAAGCTGACACCCCTGTGCGTTACTGCACTGTACCAATGTGACCAAT<br/>AATATCACCGACGACATGAGAGGCGAGCTGAAAACTGCAGCTTTAACATGACCACAGAACTGAGAGACAAGAAGCAGAAAGG<br/>TGTACAGCCTGTTTTATAGACTGGACGTGGTGCAGATCAACGAGAACCAGGGCAACAGATCCAAACAGCAACAAGGAGTA<br/>CAGACTGATTAACCTGCAATACAAGCGCCATACCCAAAGCTTGTCTAAGGTGAGCTTCGAGCCATCCCACTCACTGTGC<br/>CCCTGCCGCTTCCCATCTGAAGTGCAAAGACAAGAAATTCACCGCACCGGCCCTTGGCCTAGCGTGTGACCCGTTAGT<br/>GCACCCATGGATCAAGCCTGTGGTCCAGCACCAGCTGTGCTCAACGGCTCTGTGGCGAAGAAGAGGTTGATCATTCCGGAGC<br/>GAGAACATCAACAACAGCCAAAGAATATTCTGGTCAACTGAACACCCCACTGAGATCAACTGTACAAGACCTAACAACA<br/>ACACCGTGAATCCATCAGAATTGGGCCCGGCCAGGCTTCTACTACACCGGCGACATCATCGGAGATATAGACAGGCCAC<br/>TGCAACGTGTCCAAGGCCATGGAACGAGACACTGGGAAAGTGGTGAACAGCTGAGAAAGCACTTCGGCAACAACACCA<br/>TCATCCGTTTCCGCCAGAGCAGCGCGGCGCCTGGAAGTGCACACACAGCTTCAACTGCGCGCGGCGAGTTCTTCTATTGC<br/>AACACCAGCGGACTGTTTAAACAGCAGCTGGATCAGAAACCTCCGTGCAGGGAAGCAATTTACAGGCGAGCAATGATAGCAT<br/>CACTCTGCCTTGTAGAATCAAGCAGATCATTAAACATGTGGCAGCGGATCGGCCAGGCAATGTACGCCCACTATCCAGGGCG<br/>TGATCCGGTGCCTGAGCAACATCACAGGCTGATCTGACCGGGACGGCGGAAGCACAACCTCCACAACCGAAACCTTTAGA<br/>CTGGCGGGCGGATATGCGGGACAACCTGGCGGAGCGAGCTGTACAAGTACAAGGTGGTGAAGATCGAGCCTCTGGGCGTCC<br/>CCCTACAAGATGCAAGAGACGGGTGGTTCGGAAGACGGCGCGGAGAGCTGTGGGATCGGCGCGGAGGATTGGGATT<br/>CCTGGCGCGCTGTGTTCTACCATGGGCGCTGCTTCTATGACTGTGACCGTGCAGGCTAGAAATCTGCTGTCTGGGATCTGTGC<br/>GCAGCAGACCACTTCTGAGAGCCCAAGAACCTCAGCAACACTGTGAAAGACACCCACTGGGCAATCAAGCAACTGCAG<br/>GCCAGTGTGGCAGTTGAGCACTACCTGAGAGATCAGCAACTGTGGAAATCTGGGGATGTAGCGGCAAGCTGATCTGTCTG<br/>CACCAACGTGCCTTGAATTTAGTCTGTCCAAATAGAAACCTGTCTGAGATCTGGGACAACATGACATGGCTGCAATGGGATA<br/>AGGAAATCAGCAACTACCCAGATCATCTACGGCCTGTCTGGAAGAGGCCAGAACAGCAGGAGAAGAAGCAGCAACAGGATCT<br/>GCTGGCCCTGGAT</p>                                      |

**Supplementary Table 7 (continued). Nucleotide sequences of the constructs used in this study**

|                            |                                                                                                                                                                                                                                                                                                                                                                                                                                                                                                                                                                                                                                                                                                                                                                                                                                                                                                                                                                                                                                                                                                                                                                                                                                                                                                                                                                                                                                                                                                                                                                                                                                                                                                                                                                                                                                                                                                                                                                                                                                                                                                                                                                                                                                                                                                                                                                                                                                                                                                                                                                                                                                 |
|----------------------------|---------------------------------------------------------------------------------------------------------------------------------------------------------------------------------------------------------------------------------------------------------------------------------------------------------------------------------------------------------------------------------------------------------------------------------------------------------------------------------------------------------------------------------------------------------------------------------------------------------------------------------------------------------------------------------------------------------------------------------------------------------------------------------------------------------------------------------------------------------------------------------------------------------------------------------------------------------------------------------------------------------------------------------------------------------------------------------------------------------------------------------------------------------------------------------------------------------------------------------------------------------------------------------------------------------------------------------------------------------------------------------------------------------------------------------------------------------------------------------------------------------------------------------------------------------------------------------------------------------------------------------------------------------------------------------------------------------------------------------------------------------------------------------------------------------------------------------------------------------------------------------------------------------------------------------------------------------------------------------------------------------------------------------------------------------------------------------------------------------------------------------------------------------------------------------------------------------------------------------------------------------------------------------------------------------------------------------------------------------------------------------------------------------------------------------------------------------------------------------------------------------------------------------------------------------------------------------------------------------------------------------|
| <p>BG505 SOSIP-T33-31A</p> | <p>ATGAAAAGGGGGCTGTGCTGTGTGCTGCTGCTGTGCGGGGCTGTGTTTGTGTACCCAGTCAGGAAATCCACGCCAGATTCCG<br/> GAGAGGAGCTAGGGCAGAAAACCTGTGGGTGACAGTCTACTATGGCGTGCCTGTCTGGAAGGACGCCGAGACCACTGTTTT<br/> GCGCTTCCGATGCCAAGGCTTACGAAACTAAGAAACAACAATGTGTGGGCTACCCATTGTGTGTTCCCAACAGACCCAAACCCC<br/> CAGGAAATCCACCTGGAGAATGTGACCCGAGGAAATCAACATGTGGAAGAACAATATGTTGGAGCAGATGCATACAGACATCA<br/> TTTCCCTGTGGGATCAGTCTCTGAAGCCTTGCCTGAAACTGACCCCACTGTGCGTCACTCCAGTGTACAAAACGTGACTAACA<br/> ATATACCCGACGATATGCGCGGAGAACTGAAGAATTGTTCTTTCAACATGACTACCGAGCTGAGGGACAAGAAAACGAAAAGT<br/> GTACAGTCTGTTTTATCGCCTGGATGTGGTCCAGATCAATGAAAACCCAGGGGAATAGAAGTAAACAATTCAAAACAAGGAGTACA<br/> GGCTGATCAATTGCAACACCAGTGCCATTACACAGGCTTGCCAAAAGTGTCAATTTGAACTATCCCAATTCATTATTGCGCAC<br/> CTGCCGGCTTCGCCATCCTGAAGTGTAAAGATAAGAAGTTCAACGGCACTGGGCCCTGCACTAATGTGAGCACTGTCCAGTGT<br/> ACCCACGGGATTAAGCCTGTGGTCTCCACCCAGCTGCTGCTGAATGGATCTCTGGCCGAGGAAGAAGTGTATCATCCGGTCTGA<br/> GAACATCACTAACAACGCTAAGAACATCCTGGTGCAGTAAACGAATCCGTCCAGATTAATTGCACTAGACCTAACAATAACA<br/> CCGTGAAATCTATCCGATTGGACCCGGCCAGTGGTTTTATTATACCGCGACATCATTTGGGGATATCCGGCAGGCACACTGTA<br/> ATGTGAGCAAGGCTACATGGAACGAGACTCTGGGGAAGGTGGTCAAACAGCTGCGCAAACATTTCCGAAAATAACACCATCAT<br/> TCGATTTGCCAATAGCTCCGGCGGGACCTGGAAGTGACAACCTCACAGCTTCAACTGCGGAGGCGAGTTCTTTTACTGTAACA<br/> CAAGTGGCCTGTTAATTCAACTTGGATCAGCAACCTCCGTGCAGGGCTCTAATTCTACCGGCTCTAACGATAGTATCACAC<br/> TGCCATGCCGGATTAAGCAGATCATTAAATATGTGGCAGAGAATCGGGCAGGCAATGTATGCCCCCTATCCAGGGAGTGATT<br/> CGATGTGTACAGCAATACACAGGCTGATTCTGACTAGAGACGGGGATCAAACAACAGCACCACAGAGACTTTCAGGCCCGG<br/> CGGGGAGACATGCGAGATAACTGGCGGTCCGAACCTGTACAAGTATAAAGTGGTCAAGATCGAGCCACTGGGAGTGGCACC<br/> ACCCGATGCAAAAAGGCGAGTGGTCCGACGCAAGAAGGCGACGAGCTGTGGGGATTGGAGCAGTCTCCCTGGGCTTTCTGG<br/> GGCCGCTGGATCTACAATGGCGCAGCCAGTATGACTCTGACCTCCAGGCCAGGAATCTGTGTCAAGGATCTGTGCAGCAG<br/> CAGAGCAACCTGTGCGCGCTCCTGAATGCCAGCAGCATCTGTGAAGGACCCCACTGGGGATCAAAGCAGCTCCAGGCACG<br/> AGTGTGGCAGTCGAGCACTACCTGAGAGATCAGCAGCTGTGGGAATCTGGGGTGCAGCGGAAAGTGTATTGTGTACCA<br/> ATGTGCCTTGGAACTCTAGTTGGAGCAATAGAAACCTGTCCGAAATCTGGGACAATATGACATGGCTCCAGTGGGATAAGGAG<br/> ATTAGCAACTACACTCAGATCATCTACGGCCTGTGGAAGAGTCCAGAATCAGCAGGAGAAGAACGAGCAGGACCTGCTGG<br/> AGCTGGACGGATCCGGTGTGGATCAGGGTCTGGTGGGGAGGAAGTGGTCTGATCACTGTGCCAGTGCCTTGGTGGCTGT<br/> AAGATTGCTCATGCACTGGTGGAGGAAAGGCTGGCCGCTTGGTGAACATCTGCCCTGGACTGACCAATCTACCGCGAGGA<br/> AGCAGCGTGGTCCGACCATGAGCTGTGCTGTGGTGAAGACCACAACCTGATGCCTTTCTAAGCTGAAAAGACGAGTGA<br/> AAGAATGCACCCCTATGAGGTGCCGAAATCTGTCGACTGCCAATTGCCGAGGGCAACCGGGAATACCTGGATTGGCTGAGA<br/> GAGAATACAGGGCTGGAGTGA</p>                                            |
| <p>BG505 SOSIP-T33-31B</p> | <p>ATGAAAAGGGGGCTGTGCTGTGTGCTGCTGCTGTGCGGGGCTGTGTTTGTGTACCCAGTCAGGAAATCCACGCCAGATTCCG<br/> GAGAGGAGCTAGGGCAGAAAACCTGTGGGTGACAGTCTACTATGGCGTGCCTGTCTGGAAGGACGCCGAGACCACTGTTTT<br/> GCGCTTCCGATGCCAAGGCTTACGAAACTAAGAAACAACAATGTGTGGGCTACCCATTGTGTGTTCCCAACAGACCCAAACCCC<br/> CAGGAAATCCACCTGGAGAATGTGACCCGAGGAAATCAACATGTGGAAGAACAATATGTTGGAGCAGATGCATACAGACATCA<br/> TTTCCCTGTGGGATCAGTCTCTGAAGCCTTGCCTGAAACTGACCCCACTGTGCGTCACTCCAGTGTACAAAACGTGACTAACA<br/> ATATACCCGACGATATGCGCGGAGAACTGAAGAATTGTTCTTTCAACATGACTACCGAGCTGAGGGACAAGAAAACGAAAAGT<br/> GTACAGTCTGTTTTATCGCCTGGATGTGGTCCAGATCAATGAAAACCCAGGGGAATAGAAGTAAACAATTCAAAACAAGGAGTACA<br/> GGCTGATCAATTGCAACACCAGTGCCATTACACAGGCTTGCCAAAAGTGTCAATTTGAACTATCCCAATTCATTATTGCGCAC<br/> CTGCCGGCTTCGCCATCCTGAAGTGTAAAGATAAGAAGTTCAACGGCACTGGGCCCTGCACTAATGTGAGCACTGTCCAGTGT<br/> ACCCACGGGATTAAGCCTGTGGTCTCCACCCAGCTGCTGCTGAATGGATCTCTGGCCGAGGAAGAAGTGTATCATCCGGTCTGA<br/> GAACATCACTAACAACGCTAAGAACATCCTGGTGCAGTAAACGAATCCGTCCAGATTAATTGCACTAGACCTAACAATAACA<br/> CCGTGAAATCTATCCGATTGGACCCGGCCAGTGGTTTTATTATACCGCGACATCATTTGGGGATATCCGGCAGGCACACTGTA<br/> ATGTGAGCAAGGCTACATGGAACGAGACTCTGGGGAAGGTGGTCAAACAGCTGCGCAAACATTTCCGAAAATAACACCATCAT<br/> TCGATTTGCCAATAGCTCCGGCGGGACCTGGAAGTGACAACCTCACAGCTTCAACTGCGGAGGCGAGTTCTTTTACTGTAACA<br/> CAAGTGGCCTGTTAATTCAACTTGGATCAGCAACCTCCGTGCAGGGCTCTAATTCTACCGGCTCTAACGATAGTATCACAC<br/> TGCCATGCCGGATTAAGCAGATCATTAAATATGTGGCAGAGAATCGGGCAGGCAATGTATGCCCCCTATCCAGGGAGTGATT<br/> CGATGTGTACAGCAATACACAGGCTGATTCTGACTAGAGACGGGGATCAAACAACAGCACCACAGAGACTTTCAGGCCCGG<br/> CGGGGAGACATGCGAGATAACTGGCGGTCCGAACCTGTACAAGTATAAAGTGGTCAAGATCGAGCCACTGGGAGTGGCACC<br/> ACCCGATGCAAAAAGGCGAGTGGTCCGACGCAAGAAGGCGACGAGCTGTGGGGATTGGAGCAGTCTCCCTGGGCTTTCTGG<br/> GGCCGCTGGATCTACAATGGCGCAGCCAGTATGACTCTGACCTCCAGGCCAGGAATCTGTGTCAAGGATCTGTGCAGCAG<br/> CAGAGCAACCTGTGCGCGCTCCTGAATGCCAGCAGCATCTGTGAAGGACCCCACTGGGGATCAAAGCAGCTCCAGGCACG<br/> AGTGTGGCAGTCGAGCACTACCTGAGAGATCAGCAGCTGTGGGAATCTGGGGTGCAGCGGAAAAGCTGATTTGCTGTACCA<br/> ATGTGCCTTGGAACTCTAGTTGGAGCAATAGAAACCTGTCCGAAATCTGGGACAATATGACATGGCTCCAGTGGGATAAGGAG<br/> ATTAGCAACTACACTCAGATCATCTACGGCCTGTGGAAGAGTCCAGAATCAGCAGGAGAAGAACGAGCAGGACCTGCTGG<br/> AGCTGGACGGATCCGGTGTGGATCTGGATCTGGTGTGCGCGGCATCCGGGAGCTATCCCGTGGAGGAGGACACACCA<br/> GCTGCTATCCTGGTGTACCATCGAGCTGTGCTGAAGATGCTGGAGGCAACGGCATCCAGAGTACGAGGAGCTGGCCG<br/> TGTGATCTTACCCTGACAGAGGATCTGACATCCGCTTTCCAGCTGAGGCTGTAGGCTGATCGGAATGCACCGGGTGGCCCT<br/> GCTGTCCGCCGAGGTGCCGCTGGCTCTGTGCCAGAGTATCAGAGTGTGCTGTGTGGAACCCGACACACCAC<br/> AGGATAGAGTGCACCAGTGTATCTGAATGAGGCCGTGCGGCTGAGGCCAGATCTGGAGTCTGCTCAGCTGGAG</p> |

**Supplementary Table 8. EMDB and PDB accession IDs for the models and maps produced in this study**

| <b>Sample description</b>                                                                      | <b>EMDB ID</b> | <b>PDB ID</b> |
|------------------------------------------------------------------------------------------------|----------------|---------------|
| nsEM maps of Grp 1 polyclonal samples (Wk 26)                                                  | 23175          | N/A           |
| nsEM maps of Grp 2 polyclonal samples (Wk 26)                                                  | 23176          | N/A           |
| nsEM maps of Grp 3 polyclonal samples (Wk 8)                                                   | 23177          | N/A           |
| nsEM maps of Grp 3 polyclonal samples (Wk 10)                                                  | 23178          | N/A           |
| nsEM maps of Grp 3 polyclonal samples (Wk 26)                                                  | 23179          | N/A           |
| nsEM maps of Grp 3 polyclonal samples (Wk 38)                                                  | 23180          | N/A           |
| nsEM map of Rh.33172 (Wk 26) polyclonal sample (antigen: BG505 SOSIP.v3)                       | 23182          | N/A           |
| nsEM map of Rh.33172 (Wk 26) polyclonal sample (antigen: BG505 SOSIP.v5.2(7S) N241/N289)       | 23181          | N/A           |
| nsEM map of Rh.33311 (Wk 26) polyclonal sample (antigen: BG505 SOSIP.v3)                       | 23183          | N/A           |
| nsEM map of Rh.33311 (Wk 26) polyclonal sample (antigen: BG505 SOSIP.v5.2(7S) N241/N289)       | 23184          | N/A           |
| nsEM map of the BG505 SOSIP-T33-31A nanoparticle component                                     | 23185          | N/A           |
| nsEM map of the BG505 SOSIP-T33-31A nanoparticle component                                     | 23186          | N/A           |
| cryoEM map and model of the BG505 SOSIP (A) subparticle of the BG505 SOSIP-T33-31 nanoparticle | 23218          | 7L7T          |
| cryoEM map of the BG505 SOSIP (B) subparticle of the BG505 SOSIP-T33-31 nanoparticle           | 23219          | 7L7U          |
| cryoEM map and model of the T33-31 core subparticle of the BG505 SOSIP-T33-31 nanoparticle     | 23222          | 7L85          |
| cryoEM map and model of the Rh.32034 pAbC-1 (antigen: BG505 SOSIP MD39)                        | 23223          | 7L86          |
| cryoEM map and model of the Rh.32034 pAbC-2 (antigen: BG505 SOSIP MD39)                        | 23224          | 7L87          |
| cryoEM map and model of the Rh.32034 pAbC-3 (antigen: BG505 SOSIP MD39)                        | 23225          | 7L88          |
| cryoEM map and model of the Rh.32034 pAbC-4 (antigen: BG505 SOSIP MD39)                        | 23226          | 7L89          |
| cryoEM map and model of the Rh.33104 pAbC-1 (antigen: BG505 SOSIP MD39)                        | 23227          | 7L8A          |
| cryoEM map and model of the Rh.33104 pAbC-2 (antigen: BG505 SOSIP MD39)                        | 23228          | 7L8B          |
| cryoEM map and model of the Rh.33104 pAbC-3 (antigen: BG505 SOSIP MD39)                        | 23229          | 7L8C          |
| cryoEM map and model of the Rh.33104 pAbC-4 (antigen: BG505 SOSIP MD39)                        | 23230          | 7L8D          |
| cryoEM map and model of the Rh.33311 pAbC-1 (antigen: BG505 SOSIP.v5.2 N241/N289)              | 23236          | 7L8T          |
| cryoEM map and model of the Rh.33311 pAbC-2 (antigen: BG505 SOSIP.v5.2 N241/N289)              | 23237          | 7L8U          |
| cryoEM map and model of the Rh.33311 pAbC-3 (antigen: BG505 SOSIP.v5.2 N241/N289)              | 23238          | 7L8W          |
| cryoEM map and model of the Rh.33311 pAbC-4 (antigen: BG505 SOSIP.v5.2 N241/N289)              | 23239          | 7L8X          |
| cryoEM map and model of the Rh.33311 pAbC-5 (antigen: BG505 SOSIP.v5.2 N241/N289)              | 23240          | 7L8Y          |
| cryoEM map of the Rh.33311 pAbC-6 (antigen: BG505 SOSIP.v5.2 N241/N289)                        | 23241          | N/A           |
| cryoEM map and model of the Rh.33311 pAbC-7 (antigen: BG505 SOSIP.v5.2 N241/N289)              | 23242          | 7L8Z          |
| cryoEM map and model of the Rh.33311 pAbC-8 (antigen: BG505 SOSIP.v5.2 N241/N289)              | 23243          | 7L90          |
| cryoEM map and model of the Rh.33172 pAbC-1 (antigen: BG505 SOSIP.v5.2(7S) N241/N289)          | 23231          | 7L8E          |
| cryoEM map and model of the Rh.33172 pAbC-2 (antigen: BG505 SOSIP.v5.2(7S) N241/N289)          | 23232          | 7L8F          |
| cryoEM map and model of the Rh.33172 pAbC-3 (antigen: BG505 SOSIP.v5.2(7S) N241/N289)          | 23233          | 7L8G          |
| cryoEM map and model of the Rh.33172 pAbC-4 (antigen: BG505 SOSIP.v5.2(7S) N241/N289)          | 23235          | 7L8S          |
| cryoEM map of the Rh.33172 pAbC-5 (antigen: BG505 SOSIP.v5.2(7S) N241/N289)                    | 23234          | N/A           |

**A**

|                                | A501C | A605C | I559P | E64K | A316W | A73C | A561C | S613T | P240T | S241N | T290E | P291S | F288L | M271I | T106E | Q658K | R304V | A319Y | N363Q | F519S | A561P | L568D | V570H | R585H |  |  |
|--------------------------------|-------|-------|-------|------|-------|------|-------|-------|-------|-------|-------|-------|-------|-------|-------|-------|-------|-------|-------|-------|-------|-------|-------|-------|--|--|
| BG505 SOSIP.v3                 |       |       |       |      |       |      |       |       |       |       |       |       |       |       |       |       |       |       |       |       |       |       |       |       |  |  |
| BG505 SOSIP.v5.2 N241/N289     |       |       |       |      |       |      |       |       |       |       |       |       |       |       |       |       |       |       |       |       |       |       |       |       |  |  |
| BG505 SOSIP MD39               |       |       |       |      |       |      |       |       |       |       |       |       |       |       |       |       |       |       |       |       |       |       |       |       |  |  |
| BG505 SOSIP.v5.2(7S) N241/N289 |       |       |       |      |       |      |       |       |       |       |       |       |       |       |       |       |       |       |       |       |       |       |       |       |  |  |

**B**

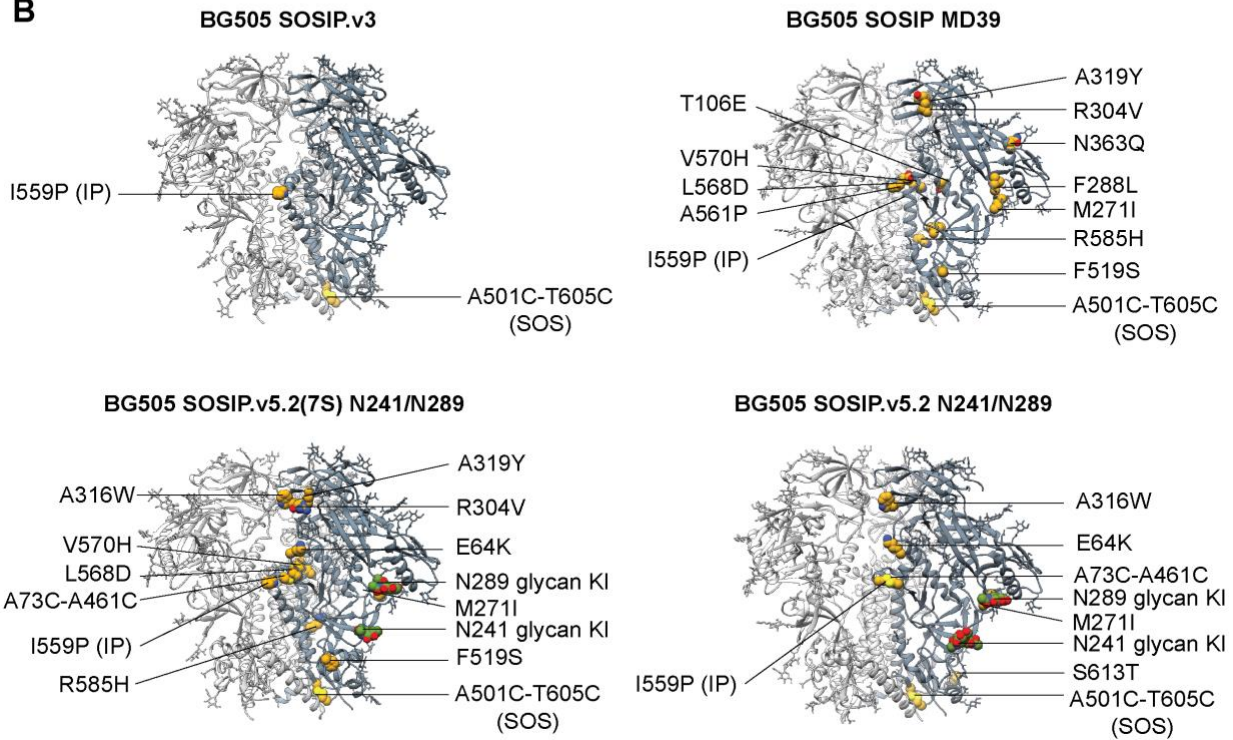

**Supplementary Figure 1. Stabilizing and glycan knock-in mutations in BG505 SOSIP constructs used in this study.** In panel [A] the mutations are presented in a table format (green – mutation present; red – mutation not present), and in panel [B] they are displayed on a structure of BG505 SOSIP. For simplicity the mutations are shown for one protomer only (dark-gray ribbon). BG505 SOSIP is displayed using ribbon representation and sphere representation was used for mutated residues (yellow – stabilizing mutations; green – glycan knock-ins).

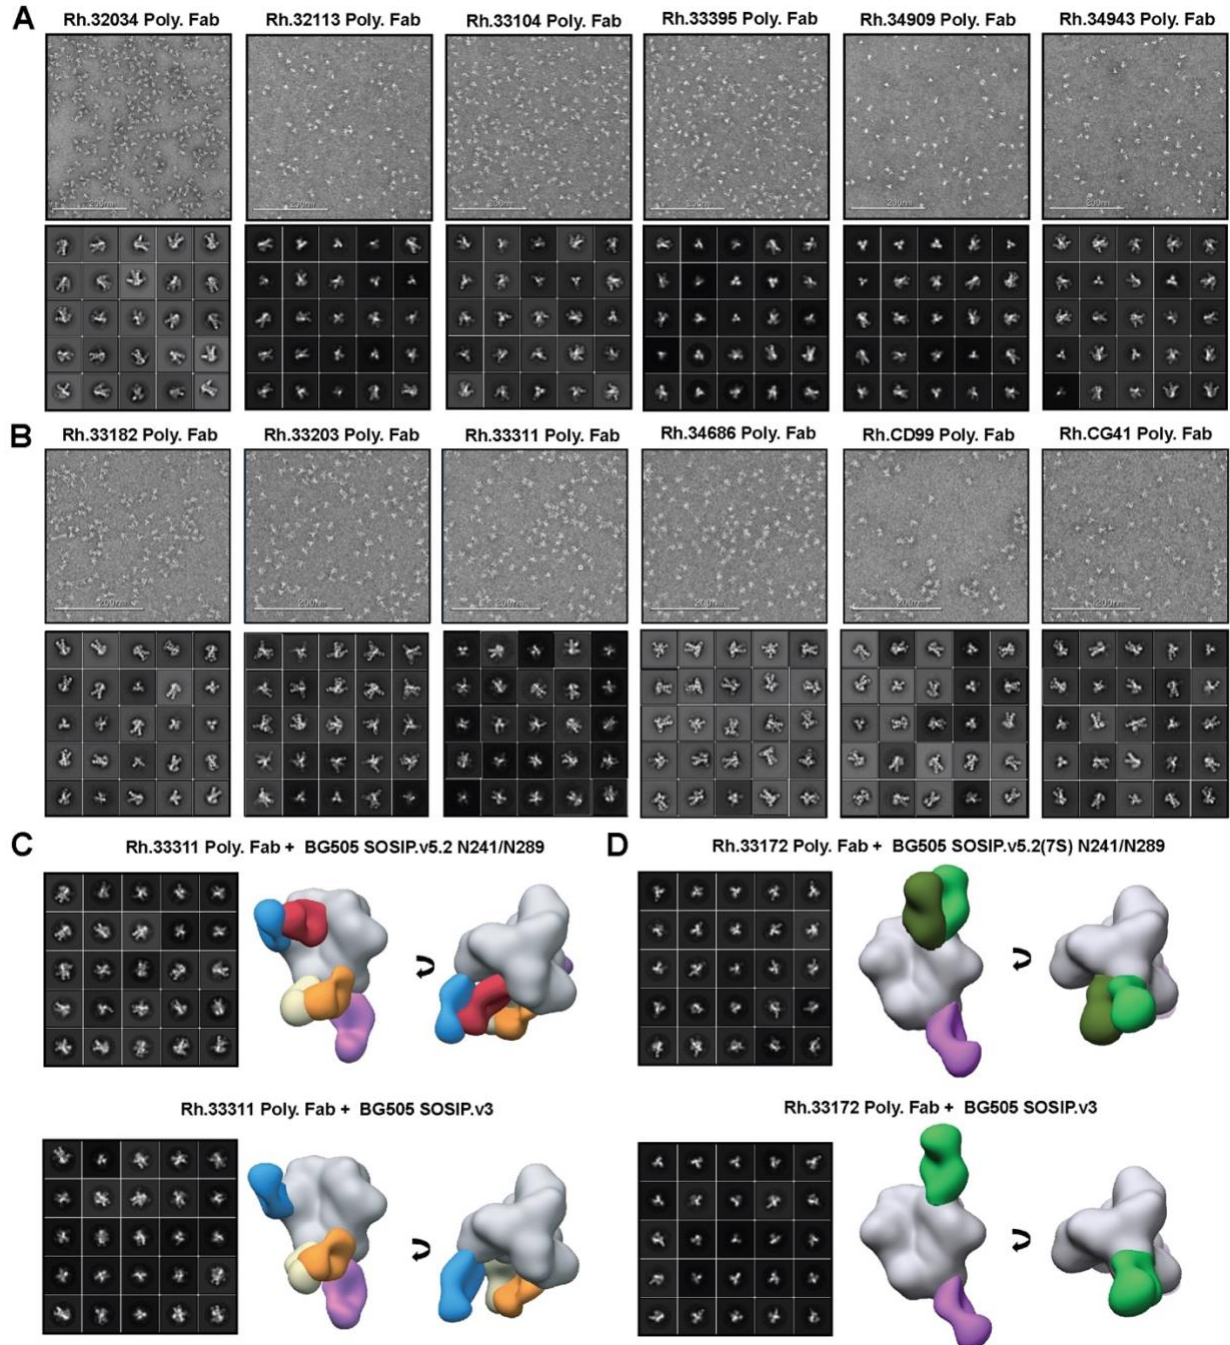

**Supplementary Figure 2. Extended nsEMPEM data.** [A,B] Representative raw EM micrographs (top) and 2D class averages (bottom) from the nsEMPEM datasets used for the generation of Grp 1 and Grp 2 composite figures presented in Figure 1d. Immune complexes were generated with BG505 SOSIP MD39 for Grp 1 and BG505 SOSIP.v5.2 N241/N289 for Grp 2. [C] An equivalent amount of polyclonal Fab sample from animal Rh.33311 (wk 26) was complexed with BG505 SOSIP.v5.2 N241/N289 and BG505 SOSIP.v3 and imaged using EM to investigate the effect engineered stabilizing mutations have on antibody binding. Raw EM micrographs, 2D class averages and composite figures for the two nsEMPEM experiments are shown. [D] Similar experiment as in panel [C] was performed with Rh.33172 polyclonal Fab (wk 26). BG505 SOSIP.v5.2(7S) N241/N289 and BG505 SOSIP.v3 antigens were used for complexing. For color scheme, see the legend in Figure 1. In panel [D] two different shades of green (olive and bright green) were used to depict different polyclonal antibody classes targeting partially overlapping V1/V2/V3 epitopes. The scale bar in raw micrographs is 200 nm and the box size for 2D classes is 39.4 nm (192 pixels). The nsEMPEM experiments have been performed once.

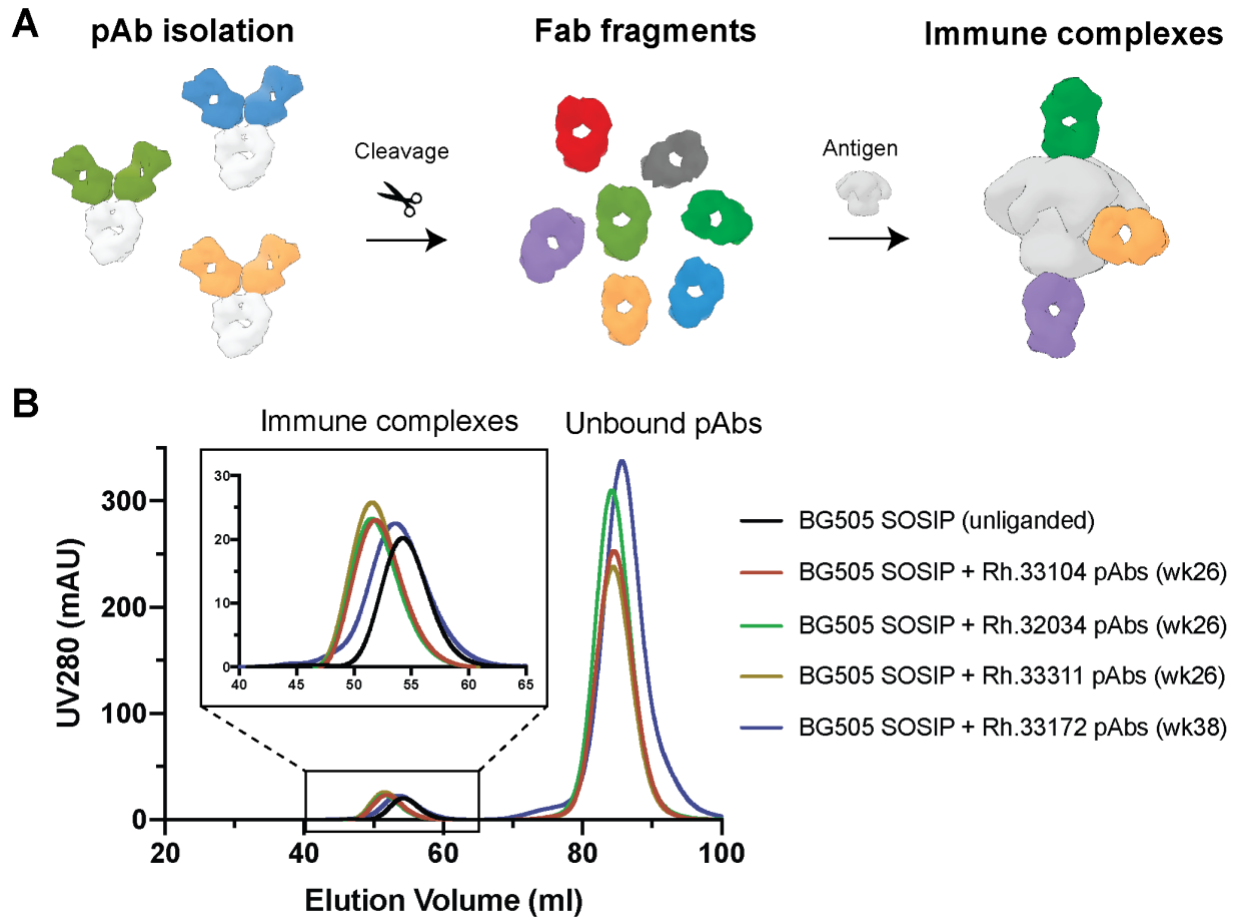

**Supplementary Figure 3. Assembly and SEC purification of the polyclonal immune complexes.** [A] Schematic overview of the early steps of cryoEMPEM workflow leading to assembly of polyclonal immune complexes. [B] SEC purification of polyclonal immune complexes. The details of the experiment are provided in the Methods section. SEC chromatograms of individual samples are depicted in different colors. Unliganded BG505 SOSIP curve is displayed for reference. Note the shift in elution volume of immune complex peaks compared to the BG505 SOSIP reference, indicating the increase in size of the assembled immune complexes. All fractions corresponding to the immune complex peak (~45-60 mL) were pooled, concentrated and used for preparation of cryoEM grids.



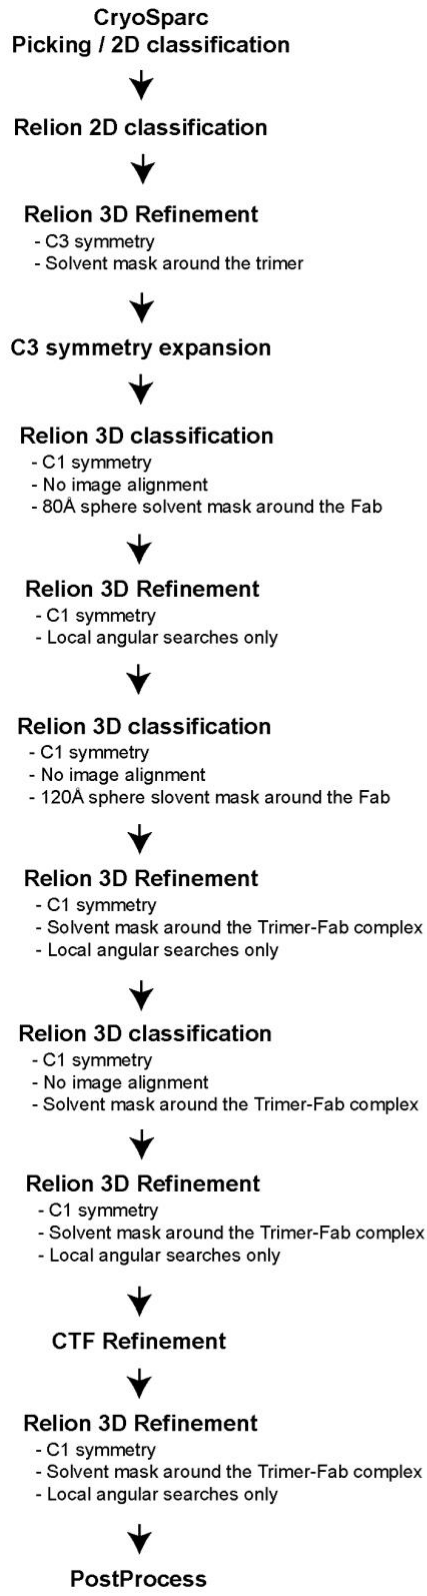

**- 2D classification**

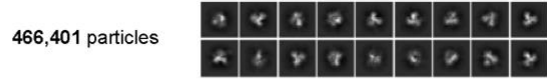

**- Initial 3D refinement with C3 symmetry**

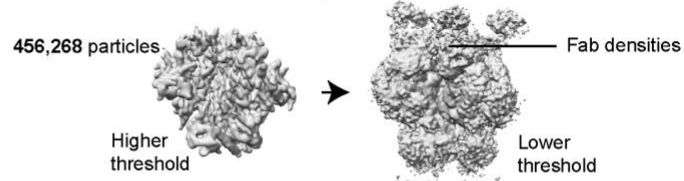

1,369,548 symmetry-expanded particles  
(after C3-symmetry expansion step)

**- 1st round of 3D classification (80Å-sphere mask around the Fab)**

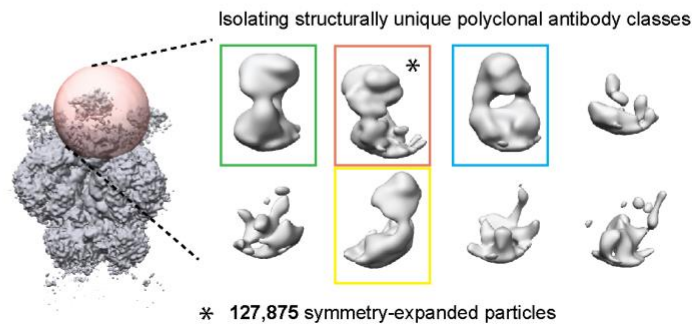

**- 2nd round of 3D classification (120Å-sphere mask around the Fab)**

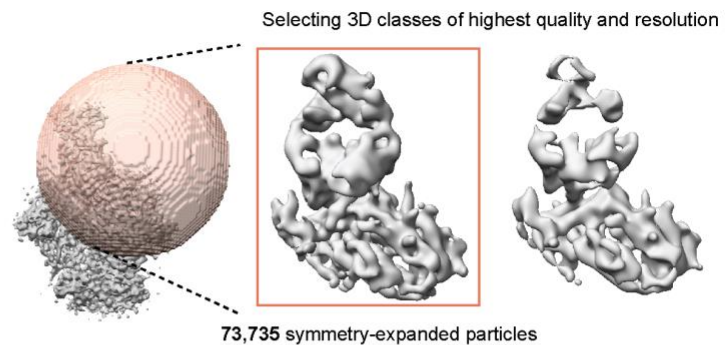

**- 3rd round of 3D classification (Solvent mask around the trimer-Fab complex)**

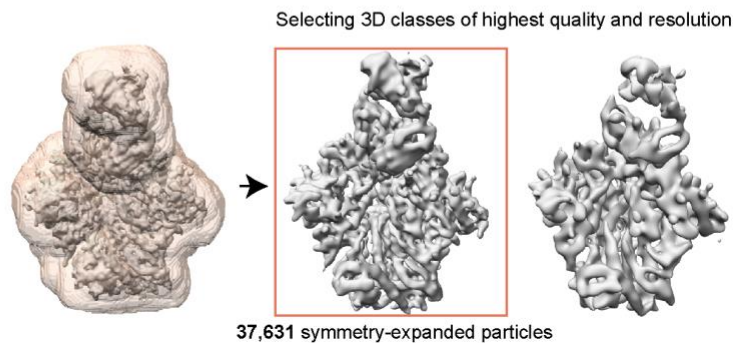

**Supplementary Figure 4. Schematic representation of the focused classification approach used for processing of cryoEMPEM data.** Full data processing workflow is shown on the left and the examples of intermediate results from the Rh.33172 dataset are shown on the right.

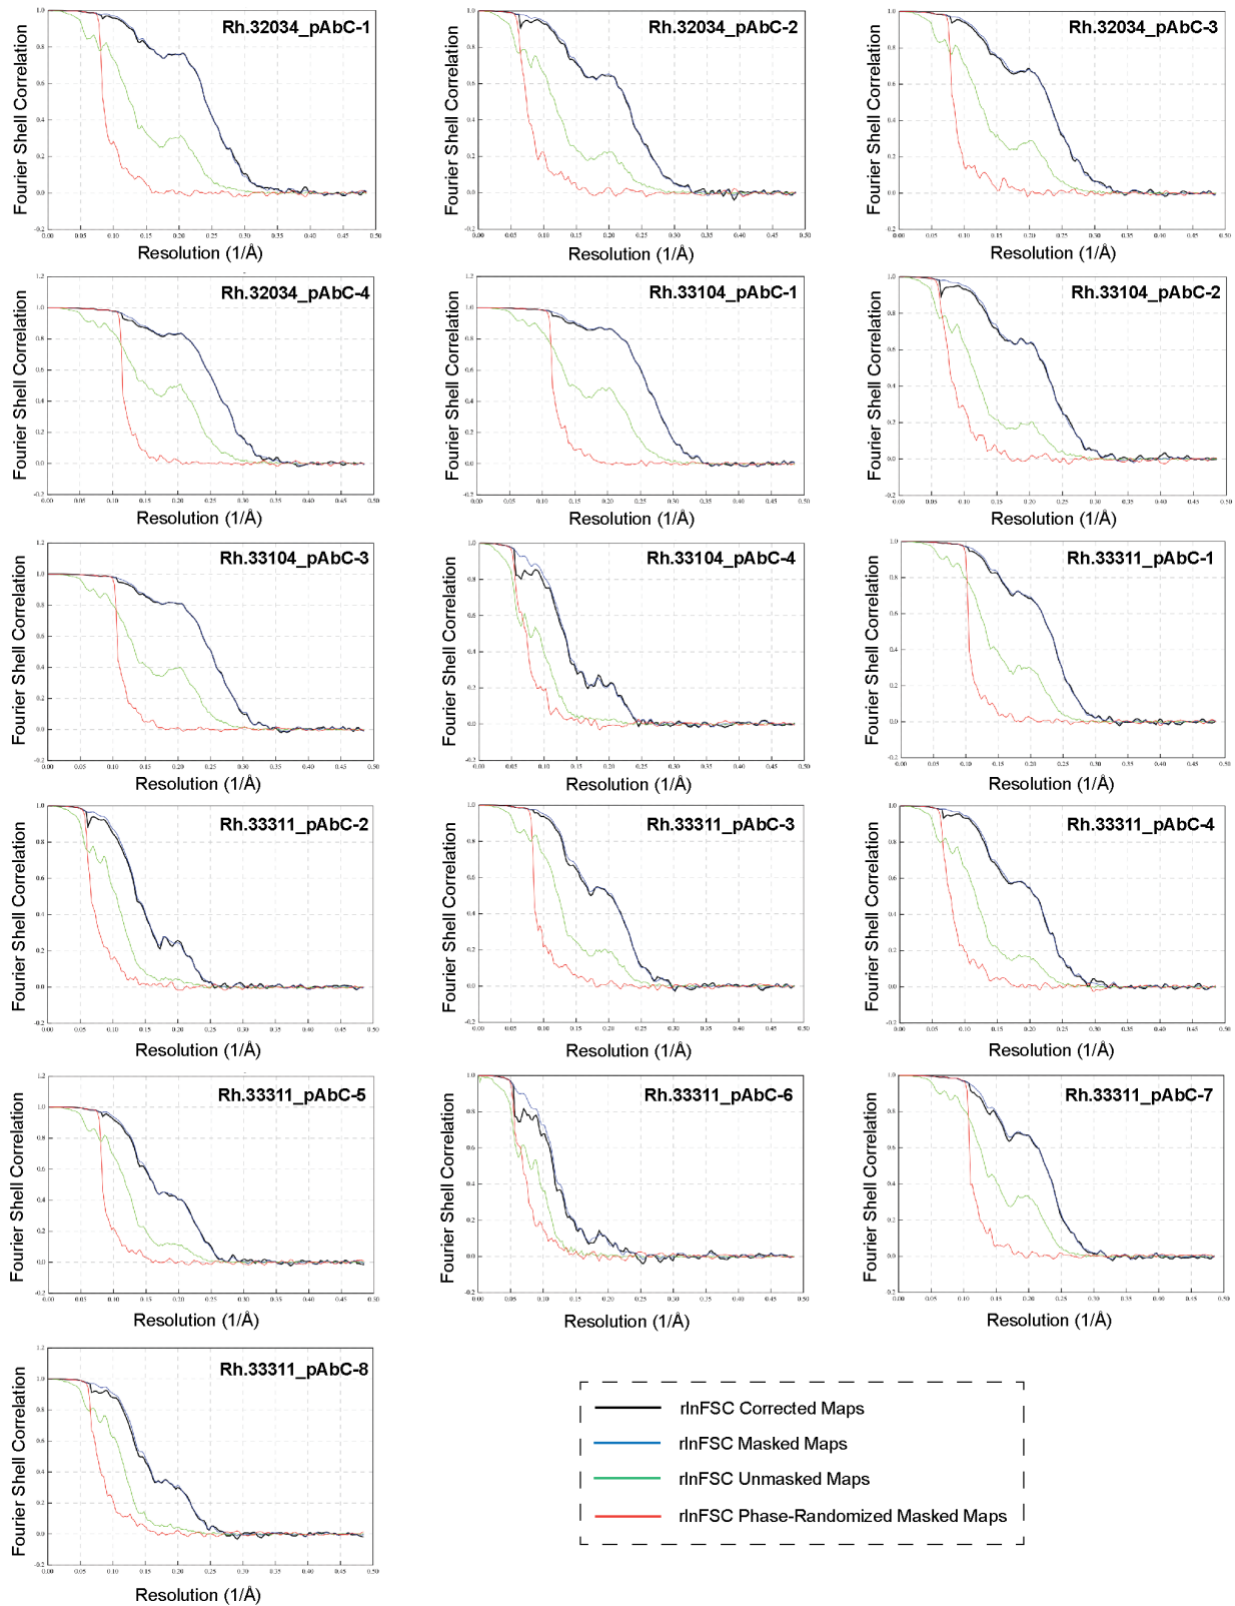

**Supplementary Figure 5. FSC resolution plots for EM maps reconstructed by cryoEMPEM analysis of polyclonal Fab samples isolated from animals Rh.32034, Rh.33104 and Rh.33311. The plots were generated in Relion/3.0.**



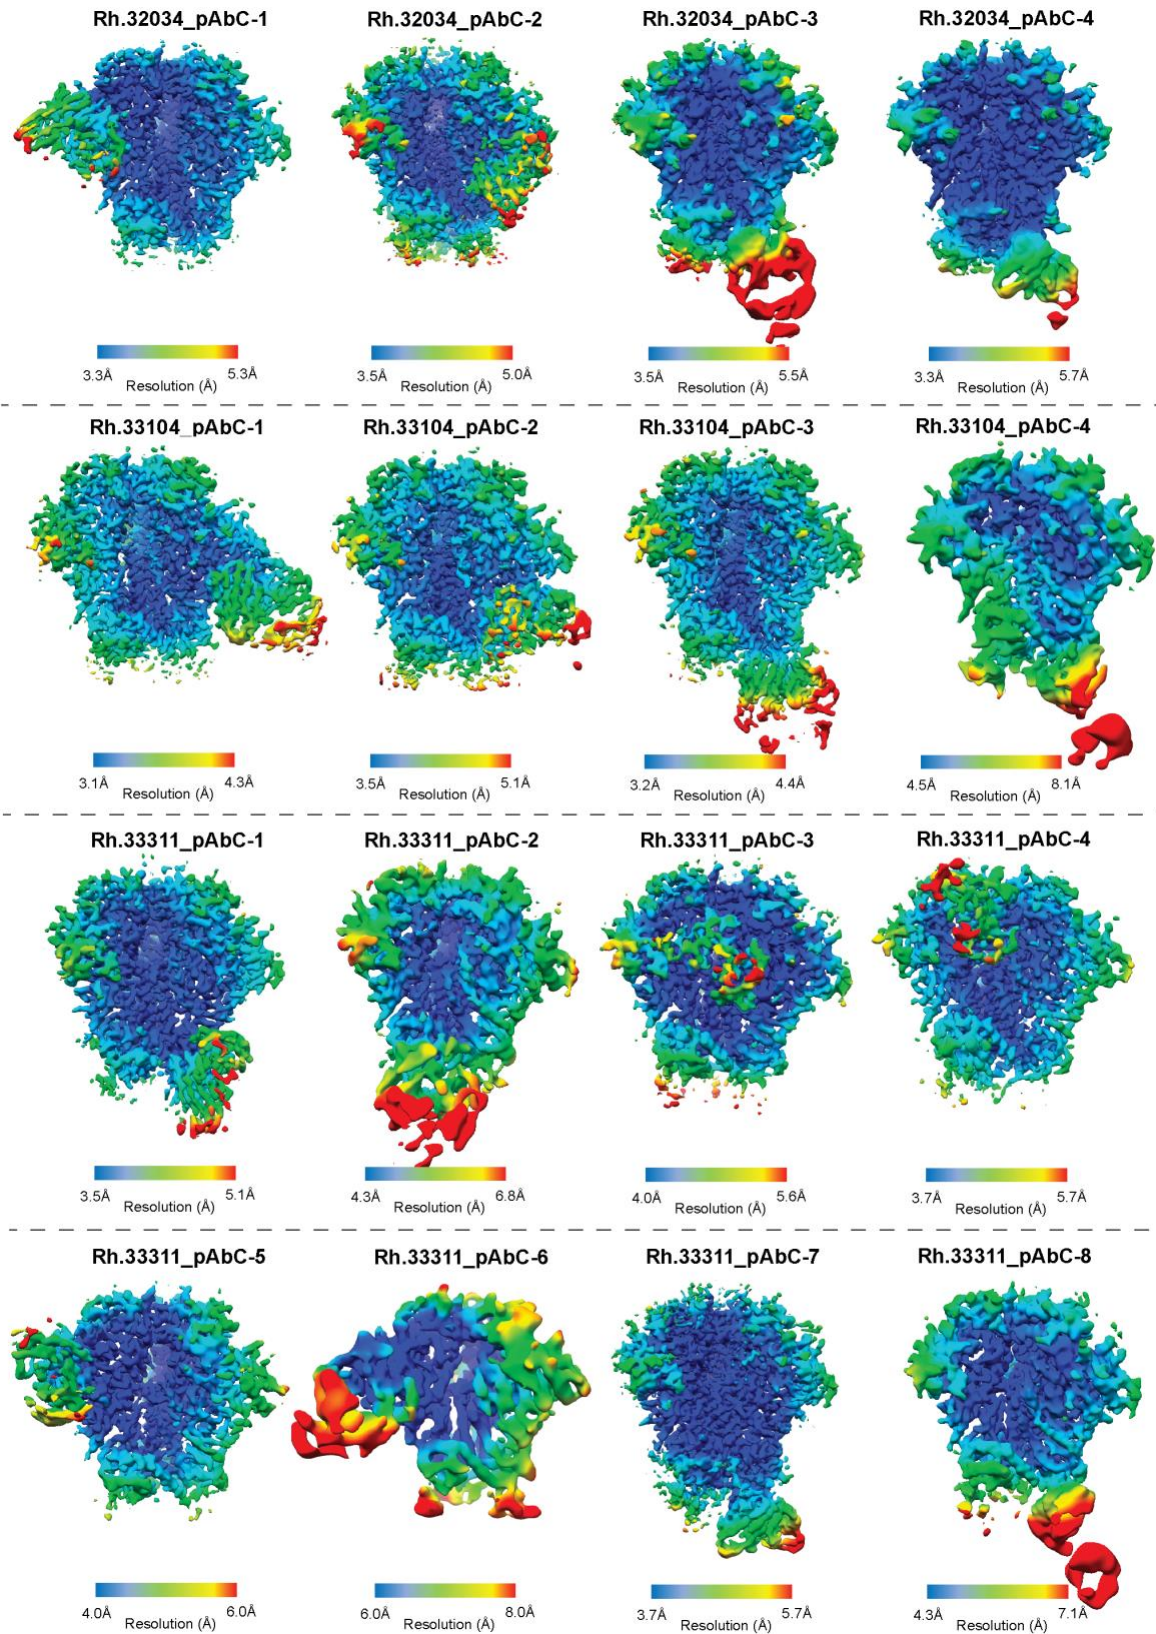

**Supplementary Figure 6. Local resolution plots for EM maps reconstructed by cryoEMPEM analysis of polyclonal Fab samples isolated from animals Rh.32034, Rh.33104 and Rh.33311. The plots were generated in Relion/3.0.**

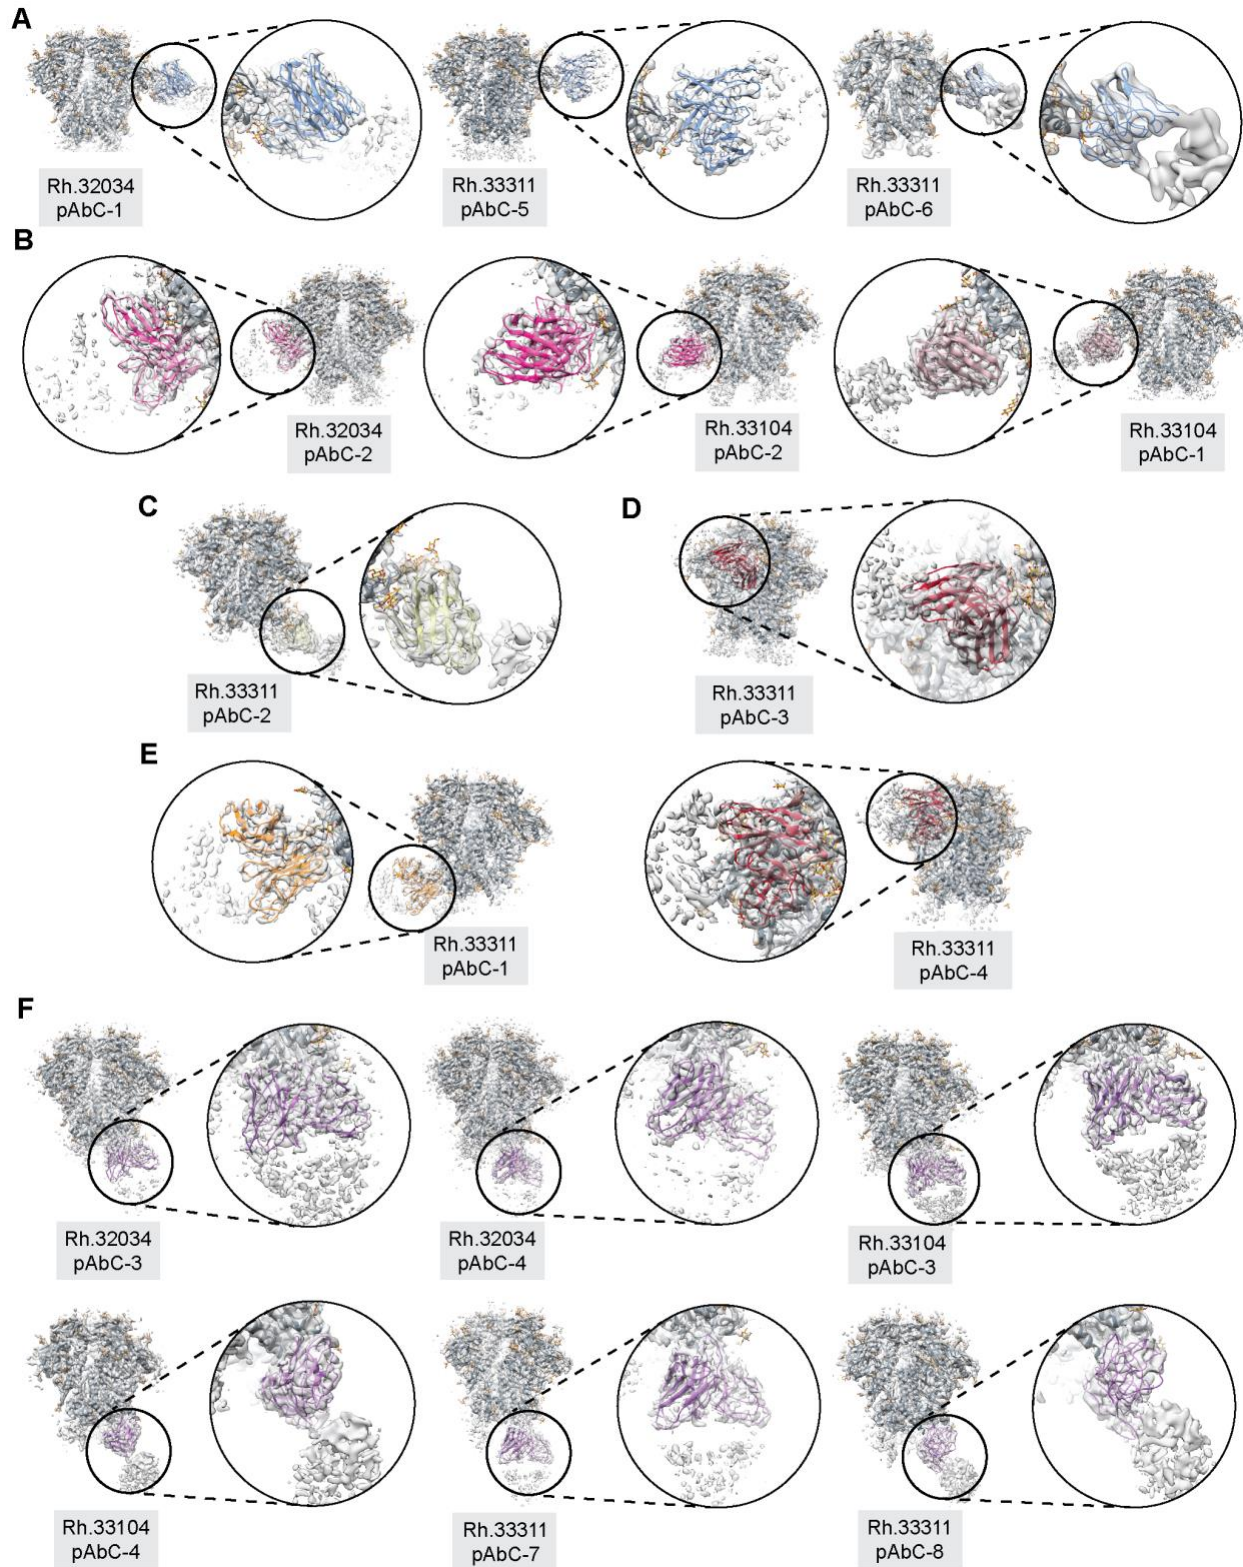

**Supplementary Figure 7. Models-to-map fit of BG505 SOSIP antigens in complex with reconstructed polyclonal antibodies.** C3/V5 epitope [A], N241/N289 glycan hole [B], N611 glycan epitope [C], gp120-gp120 interface [D], fusion peptide [E], and base of the trimer [F]. A close-up view of the antibody backbone model (poly-Alanine) in the corresponding density is shown.



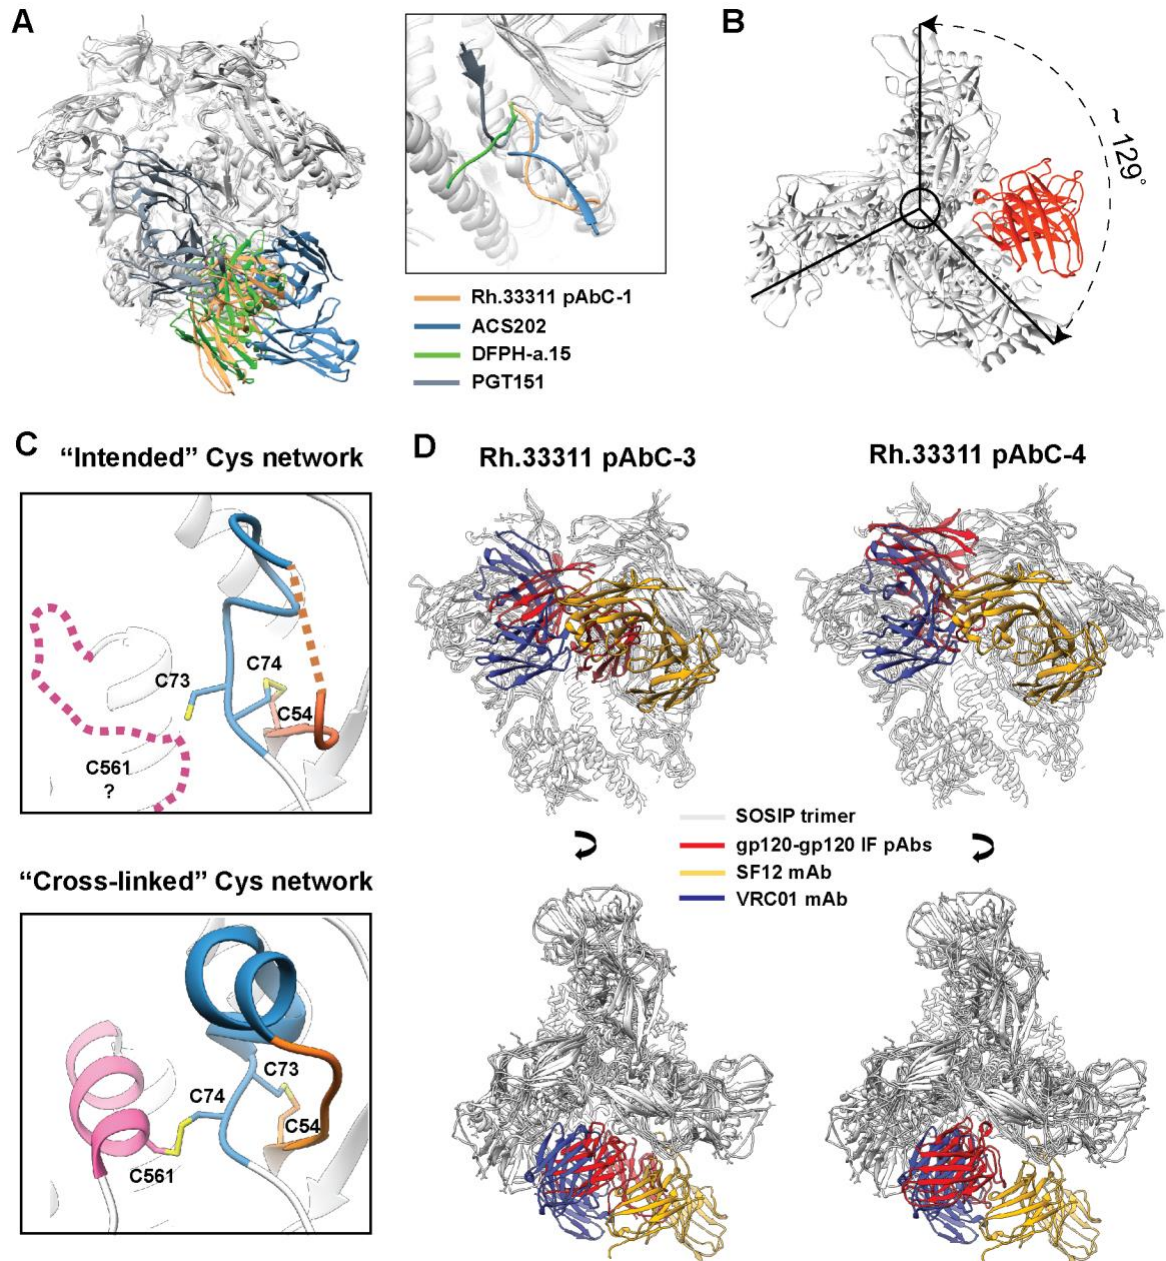

**Supplementary Figure 8. Supporting structural data associated with Figures 3 and 4.** [A] The alignment of structures of FP-targeting bNAbs and Rh.33311 pAbC-1. The figure on the left shows full Fab complex structures. FP conformation in the antibody-bound state is shown in the panel on the right. [B] A view down the 3-fold symmetry axis of the BG505 SOSIP trimer in the Rh.33311 pAbC-4 complex structure showing the splaying of the trimer upon antibody binding. [C] The differences in architecture of the C1 loop (residues 53-60 depicted in orange; residues 61-75 depicted in blue) and the HR1 region (residues 559-567 in pink), observed between the BG505 SOSIP.v5.2 structure with “intended” pairing of cysteines (PDB ID: 6VO0) and BG505 SOSIP.v5.2 model from Rh.33311 pAbC-3 (“cross-linked” Cys network). Note that altered Cys network and the binding of Rh.33311 pAbC-3 polyclonal antibody to the C1 loop stabilize the entire region and allow to build atomic coordinates for the underlying C1 and HR1 residues. [D] Overlay of the Rh.33311 pAbC-3 (left) and pAbC-4 (right) structures with monoclonal antibodies VRC01 (PDB ID: 6V8X) and SF12 (PDB ID: 6OKP), targeting the CD4bs and the silent face epitopes, respectively. Note the overlapping footprint between the gp120-gp120 interface-targeting pAbs and the two mAbs.

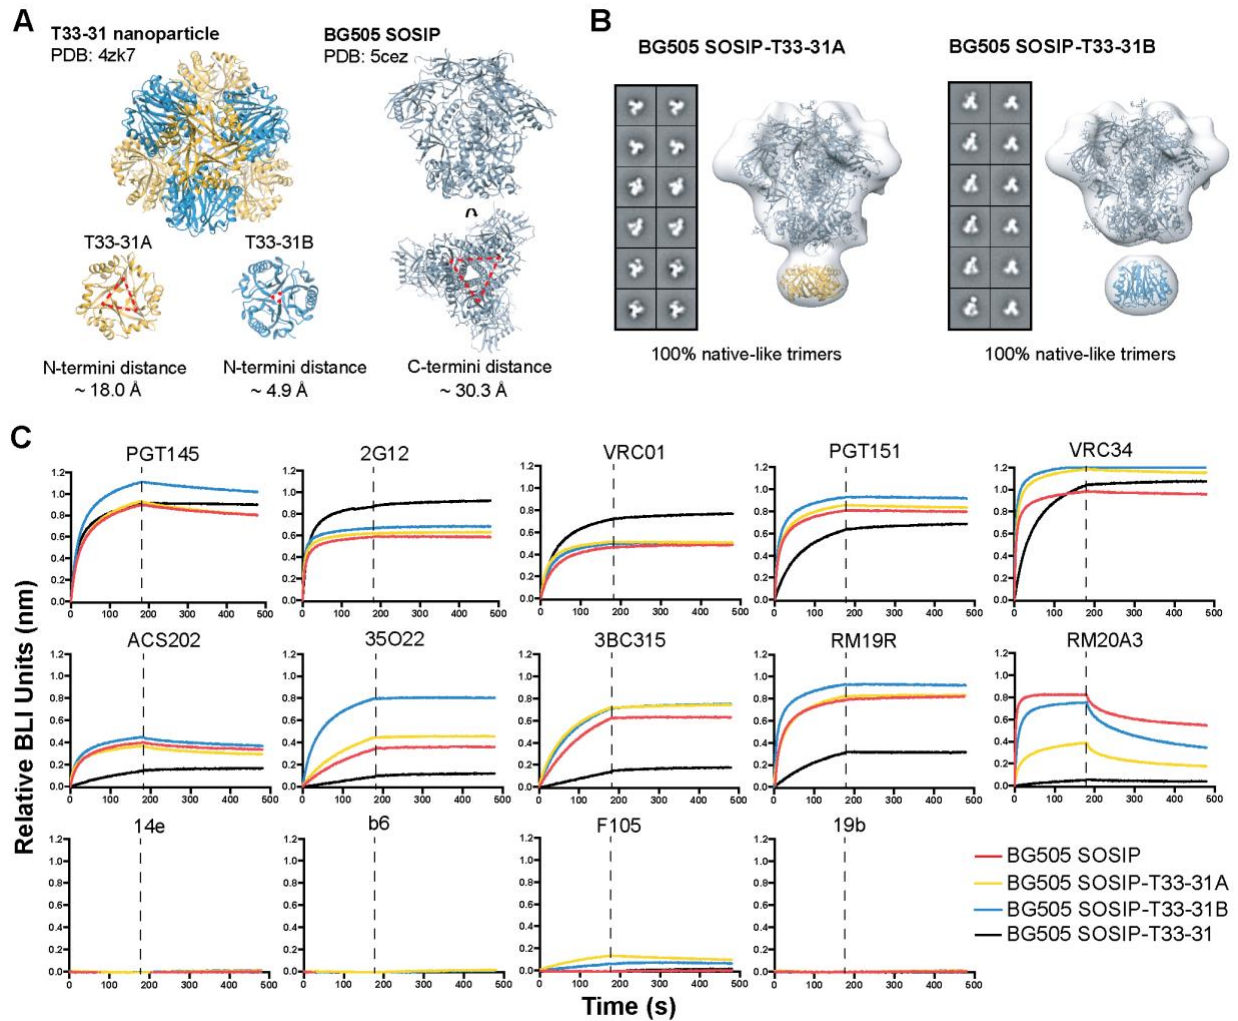

**Supplementary Figure 9. Design, structural and antigenic evaluation of the BG505 SOSIP-T33-31 nanoparticle immunogen.** [A] The structure of the T33-31 two-component nanoparticle is shown in the top left corner and the BG505 SOSIP structure is shown on the right (ribbon representation is used; component A is colored yellow; component B is colored blue; BG505 SOSIP is colored gray). The distances between corresponding fusion residues in each trimeric building block (N-termini for T33-31A and T33-31B and C-termini for BG505 SOSIP) are shown in the bottom panels and these residues are connected by red dashed lines. [B] nsEM characterization of the two nanoparticle components fused to C-termini of BG505 SOSIP trimers. 2D-class averages are shown on the left in each panel; reconstructed EM maps are displayed on the right as transparent white mesh with BG505 SOSIP and nanoparticle components docked into the corresponding parts of the map. [C] BLI-based antigenicity analysis of BG505-SOSIP.v5.2(7S) N241/N289 antigens as free trimers, fused to T33-31A and T33-31B nanoparticle building blocks and assembled into a T33-31 nanoparticle. Antibody name is indicated above the corresponding panel.



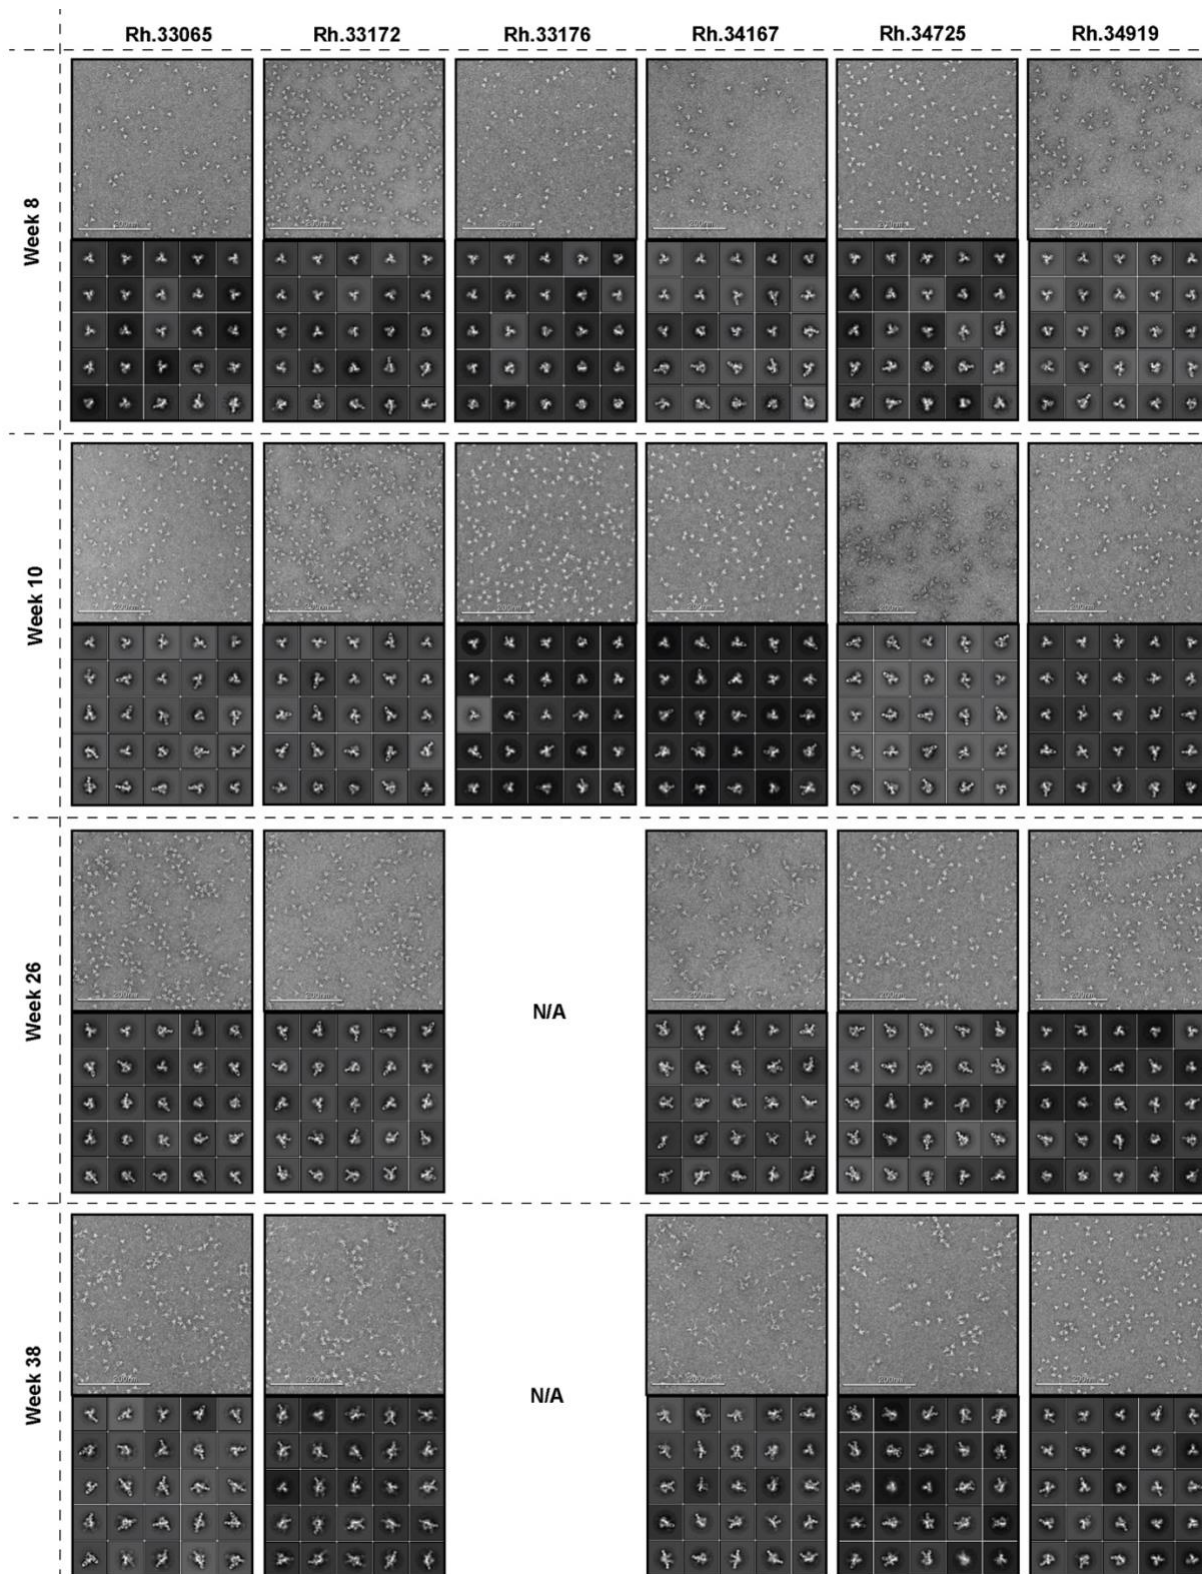

**Supplementary Figure 10. Extended nsEMPEM data.** Representative raw EM micrographs (top) and 2D class averages (bottom) from the nsEMPEM datasets used for the generation of Grp 3 composite figures presented in Figure 6d. Animal ID is shown on top and the corresponding time points at which plasma samples were extracted are shown on the left. The scale bar in raw micrographs is 200 nm and the box size for 2D classes is 39.4 nm (192 pixels). The nsEMPEM experiments have been performed once.

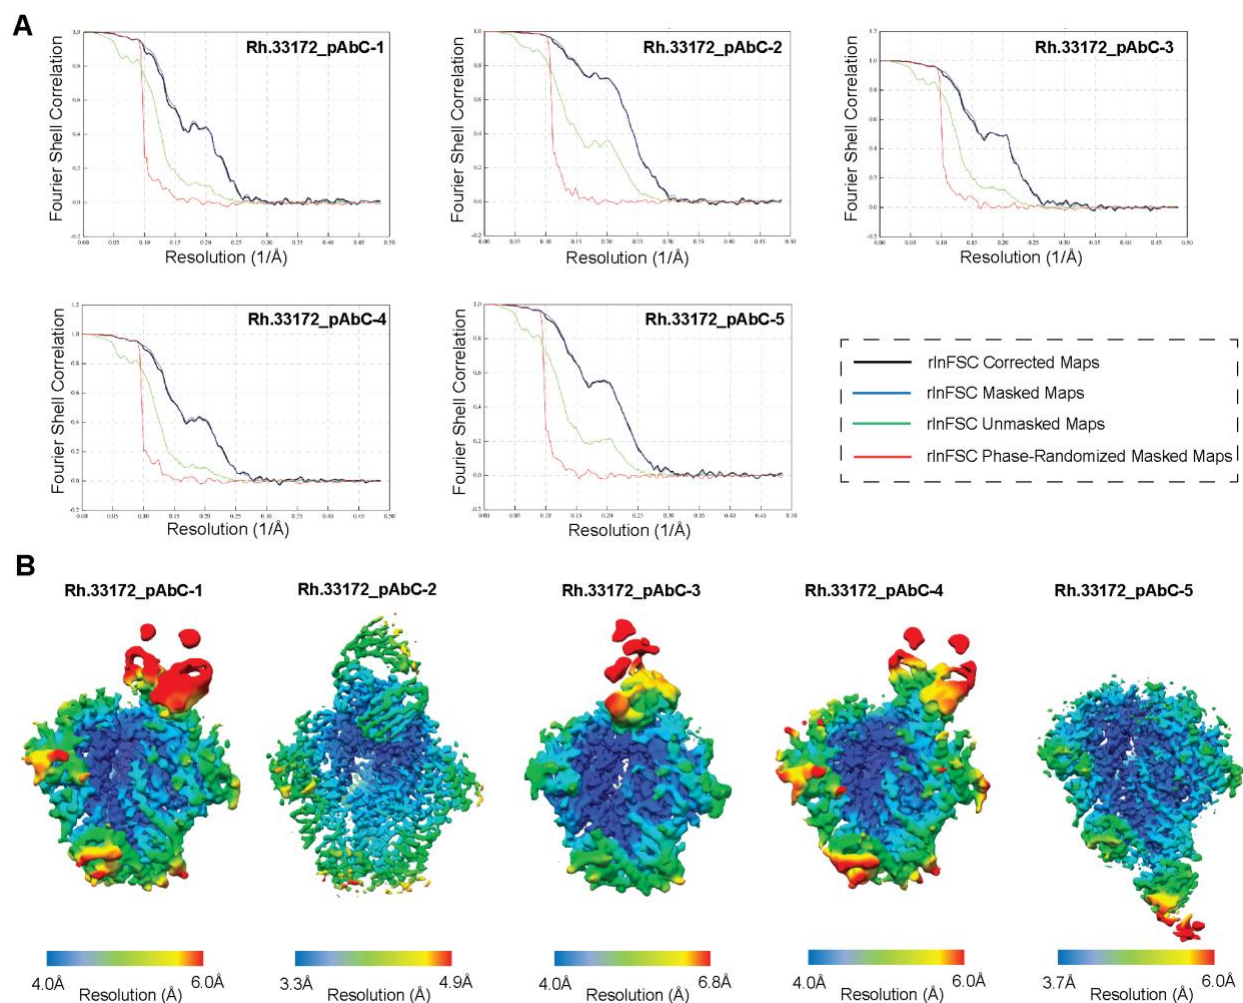

**Supplementary Figure 11. Extended cryoEMPEM data associated with Figure 7.** FSC resolution plots [A], and local resolution plots [B] for EM maps reconstructed by cryoEMPEM analysis of polyclonal Fab sample isolated from animal Rh.33172. The plots were generated in Relion/3.0.
